1     **CTCF-mediated Genomic Effects of BART Region on Epstein-**  
2     **Barr Virus Chromatin 3D Structure in Gastric Carcinoma Cells**

3  
4  
5     Kyoung-Dong Kim<sup>1</sup>, Subin Cho<sup>2</sup>, Taelyn Kim<sup>2</sup>, Sora Huh<sup>2</sup>, Lina Kim<sup>2</sup>, Hideki Tanizawa<sup>3</sup>,  
6     Jae-Ho Shin<sup>4</sup>, Teru Kanda<sup>5</sup>, Kyoung Jae Won<sup>6</sup>, Paul M. Lieberman<sup>7</sup>, Hyosun Cho<sup>8\*</sup> and  
7     Hyojeung Kang<sup>2\*</sup>

8  
9     <sup>1</sup>Department of System Biotechnolog, Chung-Ang University, Anseong, Korea

10    <sup>2</sup>Vessel-Organ Interaction Research Center, VOICE (MRC), Cancer Research Institute,  
11    College of Pharmacy, Kyungpook National University, Daegu, Korea

12    <sup>3</sup>Institute of Molecular Biology, University of Oregon, Eugene, Oregon, United States of  
13    America

14    <sup>4</sup>Department of Applied Biosciences, Kyungpook National university, Daegue, Korea

15    <sup>5</sup>Division of Microbiology, Faculty of Medicine, Tohoku Medical and Pharmaceutical  
16    University, Sendai, Japan

17    <sup>6</sup>Biotech Research and Innovation Centre (BRIC), University of Copenhagen, Copenhagen,  
18    Denmark

19    <sup>7</sup>Program in Gene Expression and Regulation, The Wistar Institute, Philadelphia,  
20    Pennsylvania, United States of America

21    <sup>8</sup>Duksung Innovative Drug Center, College of Pharmacy, Duksung Women's University,

22 Seoul, Korea

23

24 \*Corresponding Author: Hyojeung Kang, Kyungpook National University, 80 Daehak-ro,  
25 Buk-gu, Daegu 41566, Korea. Phone: 82-53-950-8569; Fax: 82-53-950-8557; E-mail:  
26 [hkang72@knu.ac.kr](mailto:hkang72@knu.ac.kr), Hyosun Cho, Duksung Women's University, Seoul, Korea. Phone: 82-  
27 2-901-8678; Fax: 82-2-901-8386; E-mail: [hyosun1102@duksung.ac.kr](mailto:hyosun1102@duksung.ac.kr)

28

## 29 **Abstract**

30 EBV latent infection in gastric carcinoma (GC) cells is characterized by distinct viral  
31 gene expression programs. CCCTC-binding factor (CTCF) is a chromatin structural factor  
32 that has been involved in coordinated chromatin interactions between multiple loci of Epstein-  
33 Barr virus (EBV) genes. Here, we investigate the role of CTCF in regulating EBV gene  
34 expression and chromosome conformation in model of EBV-associated gastric carcinoma  
35 (EBVaGC). Chromatin immunoprecipitation followed by sequencing (ChIP-seq) against  
36 CTCF revealed 16 CTCF binding sites (BS) in EBV genome of EBVaGC, SNU719 cells.  
37 Among the CTCF BSs, one site named as BARTp (BamHI A right transcript promoter) CTCF  
38 BS is located at upstream of 11.8-kb BART region (EBV genome: 139724-151554) and was  
39 not yet defined its biological functions in EBV life cycle. EBV BART encodes a complex  
40 miRNA cluster of highly spliced transcripts that is implicated in EBV cancer pathogenesis.  
41 This present study investigated the functional role of the CTCF binding site at BARTp  
42 (BARTp CTCF BS) in regulating EBV gene transcription and EBV three-dimensional (3D)  
43 genome structure as DNA loop maker. Circular chromatin confirmation capture (4C)-seq and

44 chromatin confirmation capture (3C)-semi-quantitative(sq)PCR assays using SNU719 cells  
45 revealed that BARTp CTCF BS interacts with CTCF BSs of LMP1/2, Cp/OriP, and Qp in  
46 EBV genome. We generated mutations in BARTp CTCF BS (S13) in bacmids with (BART<sup>+</sup>)  
47 or without (BART<sup>-</sup>) the 11.8-kb BART transcript unit (B(+/-)). ChIP-qPCR assay  
48 demonstrated that CTCF binding was ablated from BARTp in EBV B(+/-) S13<sup>-</sup> genomes  
49 (mutant S13), elevated at several other sites such as *LMP1*, *OriP*, and *Cp* in EBV B(-) (BART<sup>-</sup>)  
50 S13<sup>-</sup> genome, and decreased at the same sites in EBV B(+) S13<sup>-</sup> genome. Infection assay  
51 showed that BARTp CTCF BS mutation reduced infectivity, while BART transcript deletion  
52 has no detectable effects. Gene expression tests showed that *EBNA1* was highly  
53 downregulated in B(+/-) S13<sup>-</sup> EBVs related to B(+/-) S13<sup>+</sup> EBVs (wild-type S13). *LMP1* and  
54 *BZLF1* were more downregulated in B(-) S13<sup>-</sup> EBV than B(+) S13<sup>-</sup> EBV. Taken together,  
55 these findings suggest that the CTCF binding and BART region contribute to EBV 3D  
56 genome structure via a cluster of DNA loops formed by BARTp CTCF BS (S13) and are  
57 important for coordinated viral gene expression and EBV infectivity.

58

## 59 **Introduction**

60 Epstein-Barr virus (EBV) is a member of the human gamma herpesvirus family that  
61 establishes lifelong latent infection in the most population [1]. EBV latent infection is  
62 associated with lymphoma such as Burkitt's lymphoma (BL) and Hodgkin's lymphoma (HL),  
63 and epithelial neoplasm such as nasopharyngeal carcinoma (NPC) and gastric carcinoma (GC)  
64 [2, 3]. During the latency phase, EBV genome exists as multicopy episomes that express only  
65 a few of viral genes called latent genes [4]. The latency can be changed into the lytic phase  
66 depending on developmental stage, environmental signals and pharmacological manipulation

67 [5, 6]. Approximately 10% GC has been diagnosed as EBV associated gastric carcinoma  
68 (EBVaGC), estimating more than 70,000 cases worldwide per year [7-9]. EBVaGC appears  
69 lymphoepithelioma-like carcinoma whose definition is an undifferentiated carcinoma with  
70 lymphocytic infiltrate, histologically similar to NPC [2, 7]. EBV of EBVaGC maintains the  
71 type I latency phase and express the narrowest group of EBV latent genes such as *EBNA1*,  
72 *EBER*, BARTs and sometimes *LMP2A*. These genes are implicated with the EBVaGC  
73 oncogenesis [10].

74 The EBV genome contains two miRNA cluster that encoded by BamHI fragment H  
75 rightward open reading frame 1 (BHRF1) and BamHI A right transcripts (BARTs) [11-14].  
76 EBV BARTs are a complex miRNA cluster of highly spliced transcripts initially found in  
77 NPC EBV strain [15, 16]. Some lymphotropic BL EBV strain, like B95-8, have a deletion  
78 overlapping the 11.8-kb BART region (139724-151554), while EBV strains derived from GC,  
79 such as GC1 and YCCEL1, contain the full BART region [17, 18]. BART miRNAs are  
80 substantially expressed in EBV infected epithelial cells such as NPC and EBVaGC [19-21].  
81 The BART miRNAs are highly implicated in EBV-mediated epithelial malignancies but  
82 sometimes dispensable in EBV-mediated lymphoma. Thus, their function in EBV life cycle  
83 is only partially elucidated [22].

84 The maintenance of chromatin structure is also largely dependent on cellular  
85 mechanisms that regulate several chromatin interactions exemplified an interaction between  
86 enhancer and promoter [23-26]. The CCCTC-binding factor, also referred to CTCF, is a  
87 transcription factor that contains DNA binding domain and 11 zinc fingers. CTCF is involved  
88 in other functions such as epigenetic insulator, gene boundary factor and DNA looping maker  
89 [27-29]. In particular, CTCF is highly associated with regulating long range chromatin

90 interaction by chromatin loop organization [30]. Cohesin composed of SMC1, SMC3, and  
91 non-SMC components including RAD21, SA1, and SA3 are known to assist in CTCF-  
92 mediated stabilization of EBV genome structure [31-33]. Cohesion binds at multiple control  
93 regions of EBV genes and involves in maintain EBV genome structure to regulate EBV gene  
94 expression, along with CTCF [34-36].

95 Here, we have identified 16 CTCF binding sites (BS) in the EBV genome in EBVaGC  
96 using ChIP-seq analysis against CTCF. Among them, one site (BARTp CTCF BS) located in  
97 close proximity to the transcription start site of the 11.8-kb BART region that has not yet been  
98 defined for its biological function in EBVaGC. This CTCF binding site, referred to here as  
99 the BARTp CTCF BS (S13), exists in most EBV genomes regardless of the existence of 11.8-  
100 kb BART. Here, we test the hypothesis that the BARTp CTCF BS (S13) is important for 3D  
101 conformation of EBV genome, and that the BART transcripts affect this conformation. We  
102 further test whether BARTp CTCF BS (S13) regulates EBV gene expression. We find that  
103 BARTp CTCF BS (S13) contributes to both BART transcription regulation and 3D  
104 conformation, and is likely to contribute to regulation of EBV oncogenesis and life cycle.

105

## 106 **Materials and Methods**

### 107 **Cell lines and Reagents**

108 HEK293 cells and HEK293-EBV bacmid cell lines were cultured in Dulbecco's  
109 Modified Eagle Medium (DMEM; Hyclone, Pittsburgh, PA, USA) supplemented with 10%  
110 Fetal Bovine Serum (FBS; Hyclone, Marlborough, MA, USA), antibiotics/antimycotics  
111 (Gibco, Waltham, MA, USA), and Glutamax (Gibco, Waltham, MA, USA) at 37°C, 5% CO<sub>2</sub>,

112 95% humidity in a CO<sub>2</sub> incubator. HEK293 cells were transfected with EBV bacmid and them  
113 selected with hygromycin B (400 µg/ml) (Wako, Japan). Gastric carcinoma cell lines SNU719  
114 (EBVaGC) was purchased from Korean Cell Line Bank (Seoul, Korea) and cultured in RPMI  
115 1640 medium (Hyclone, Pittsburgh, PA, USA) supplemented with 10 % FBS,  
116 antibiotics/antimycotics and GlutaMAX at 37 °C with 5% CO<sub>2</sub> and 95% humidity.

117

### 118 **Microscale thermophoresis (MST) assay**

119 Wild type (Wt) S13 49-mer primer set spanning EBV 138,946~138,956 was designed  
120 whose forward primer was labeled with 5-carboxyfluorescein (5-FAM) (Fig. 2A). We in  
121 parallel designed mutant (Mt) S13 49-mer set as counterpart for Wt S13 49-mer primer  
122 set. Mt S13 50-mer contains several point mutations in region spanning EBV  
123 138,963~138,987 whose mutations were expected to disrupt CTCF binding to Wt S13 49-mer  
124 primer set (Fig. 2A). 10 µl of 100 µM forward Wt S13 49-mer primer was mixed with 10  
125 µl of 100 µM reverse Wt S13 49-mer primer. The mixture was paired by placing it in a  
126 thermocycler which programmed to start at 95°C for 2 min and then gradually cool to 25°C  
127 over 45 min. In parallel, 10 µl of 100 µM forward Mt S13 49-mer primer was also mixed  
128 and paired with 10 µl of 100 µM reverse Wt S13 49-mer primer. Resultant paired both Wt  
129 and Mt (Wt/Mt) S13 49-mer primer sets were used as target DNA in MST assay. Using  
130 baculovirus expression system, his-tagged CTCF proteins were purified from Sf9 cells  
131 transfected with CTCF expression plasmid. Resultant CTCF proteins were used as ligand  
132 protein in MST assay. To make CTCF bind to Wt/Mt S13 49-mer primer sets, reaction mixture

133 was prepared as followed: 5 ul 4X EMSA buffer (400 mM KCl, 80 mM HEPES, 0.8 mM  
134 EDTA, 80% glycerol, pH 8.0) freshly added 1 mM DTT, target DNA (125 nM), 1 ul 500  
135 ng/ul sonicated salmon sperm DNA, 2.5 ul ligand protein (CTCF, 3.12  $\mu$ M, 6.25  $\mu$ M), and  
136 8.5 ul sterile water. Afterward, each mixture was incubated 30 min on ice and subjected to  
137 Nanotemper Monolith NT.115 (Munich, Germany) as recommended by manufacturer.

138

### 139 **PCR**

140 To confirm BART region in EBV genome, PCR was performed at BART region  
141 using each EBV BART<sup>+</sup> (B(+)) and EBV BART<sup>-</sup> (B(-)) S13<sup>-</sup> bacmids. One directional primers  
142 were used to avoid the amplication for self-ligation products; primers for PCR products of  
143 BART region from EBV B(+) Wt bacmid were used the forward primer. Each 25 $\mu$ l reaction  
144 contained 5  $\mu$ l of EBV B(+) and B(-) Wt bacmid templates, 5  $\mu$ l of 5 $\times$  reaction mix  
145 (NanoHelix, Korea), 5  $\mu$ l of 5 $\times$  TuneUp solution (NanoHelix, Korea), 1  $\mu$ l of Taq-plus  
146 polymerase (NanoHelix, Korea), and 2.5  $\mu$ l of 10  $\mu$ M forward/reverse primer. The following  
147 cycle conditions were used: 95 $^{\circ}$ C for 3 min; 30 cycles of 95 $^{\circ}$ C for 30 s, 55 $^{\circ}$ C for 30 s, and  
148 72 $^{\circ}$ C for 30 s; followed by 72 $^{\circ}$ C for 10 min. The reactions were performed using a TaKaRa  
149 PCR Thermal Cycler (Otsu, Japan) and then run on a 1.5% agarose/TBE gel.

150

### 151 **Real-time quantitative PCR (qPCR)**

152 Quantification of precipitated DNA was determined using real-time quantitative PCR  
153 (qPCR) with SYBER Green in FastStart Essential DNA Green Master (Roche, Basel,  
154 Switzerland). Each resultant DNA was diluted in nuclease-free water and was analyzed in

155 triplicated for EBV-associated genes and CTCF binding sites. The PCR reaction mixture of  
156 20  $\mu$ l contained 5  $\mu$ l of template DNA, 0.5  $\mu$ M of each primer and 10  $\mu$ l of Master Syber  
157 Green 1 mix (Roche, Basel, Switzerland). The Primer sequences listed in Table 1. The  
158 following cycles thermal conditions were used: 95°C for 10 min; 45 cycles of 95°C for 10  
159 sec, 55°C for 10 sec, and 72°C for 10 sec; 95°C for 5 sec; followed by 65°C for 1 min. In case  
160 of necessity, semi-quantitative PCR (sqPCR) was also conducted as previously described [37].  
161 PCR products were amplified in a 25  $\mu$ L reaction solution containing 5  $\mu$ L of 5 $\times$  reaction mix,  
162 5  $\mu$ L of 5 $\times$  TuneUp solution, 1  $\mu$ L of Taq-plus polymerase, and 2.5  $\mu$ L of 10 pmol  
163 forward/reverse primer. The following cycle conditions were used: 95°C for 3 min; 30 cycles  
164 of 95 °C for 10 s, T<sub>m</sub> (specific to primer sets) for 30 s, and 72 °C for 30 s; followed by 72 °C  
165 for 10 min. The reactions were performed using a TaKaRa PCR Thermal Cycler (TaKaRa,  
166 Kyoto, Japan) and then run on a 1.2% agarose/TBE gel.

167

## 168 **Construction of recombinant EBV bacmid**

169 Site-directed mutations were introduced at BARTp CTCF BS (S13) in EBV B(+) or  
170 B(-) (B(+/-)) bacmids to make EBV B(+/-) S13<sup>-</sup> bacmids that contains mutation in BARTp  
171 CTCF BS. EBV B(+) are isogenic and made from EBV B(-)bacmid [38]. EBV B(+/-) S13<sup>-</sup>  
172 bacmids were generated using two-step red-mediated recombination method. Primers for  
173 PCR products of the kanamycin resistant gene (Kan<sup>r</sup>) from pEPKanS3 plasmid used the  
174 forward primer 5'-GCA TCT TTC TAA CCA GTA GGG GCC TCC ACC TAG GTG CTT  
175 TGT TAA TCT TTA GTG TAT ATA TAT ATA TAT ATA TAT ATA TGG GTA CCC  
176 CTA TCC TAC AAC CAA TTA ACC AAT TCT GAT TAG-3' and the reverse primer 5'-  
177 ACA GGG ATT ATC AAG ACA AGG AGC TCC GGT AGG ACC TAT AGG ATA GGG



178 GTA CCC ATA TAT ATA TAT ATA TAT ATA TAT ACA CTA AAG ATT AAC AAA  
179 GGA TGA CGA CGA TAA GTA GGG ATA- 3'. Resultant PCR products were composed  
180 Kan<sup>r</sup> gene with I-SceI site, flanked by 60 bp downstream and upstream of EBV BARTp CTCF  
181 BS sequence surrounding the designed CTCF mutation sequence. These PCR products were  
182 electroporated into GS1783 competent cells containing EBV B(+/-) S13<sup>+</sup> bacmids for 1<sup>st</sup>  
183 round homologous recombination. EBV B(+/-) S13<sup>-</sup> bacmid with Kan<sup>r</sup> gene was recovered  
184 by positive selection, characterized by restriction enzyme digestion and transformed into  
185 GS1783 I-SceI-inducible competent cells. Kan<sup>r</sup> gene was removed from EBV bacmid-Kan<sup>r</sup>  
186 by 2<sup>nd</sup> round homologous recombination and negative selection to make complete EBV B(+/-)  
187 S13<sup>-</sup> bacmids. Final CTCF mutation was confirmed by restriction enzyme digestion and DNA  
188 sequencing of the homologous recombination site in EBV B(+/-) S13<sup>-</sup> bacmids.

189

## 190 **Transfection**

191 EBV B(+/-) S13<sup>+/-</sup> (B(+)S13<sup>+</sup>, B(+)S13<sup>-</sup>, B(-)S13<sup>+</sup>, B(-)S13<sup>-</sup>) bacmids were  
192 transfected into HEK293 cells using Neon transfection system (Invitrogen, Carlsbad, CA,  
193 USA). 5 x 10<sup>4</sup> cells were resuspended in 100 µl of serum-free media containing 5µg of each  
194 mutant recombinant bacmid. The electroporation was conducted with Neon electroporator  
195 (Invitrogen) set at 1350 V, 30 ms and 1 pulse. Cells were placed in media supplemented with  
196 10% FBS for 48 h post-transfection.

197

## 198 **Western blotting assay**

199 Western blotting was performed in HEK293-EBV B(+/-) S13<sup>+/-</sup> (B(+)S13<sup>+</sup>, B(+)S13<sup>-</sup>,

200 B(-)S13<sup>+</sup>, B(-)S13<sup>-</sup> cells. Cells ( $5 \times 10^6$ ) were then lysed using 100  $\mu$ l of RIPA lysis buffer  
201 (Promega, WI) supplemented with 1  $\mu$ l of proteinase inhibitor and 10  $\mu$ l of  
202 phenylmethylsulfonylfluoride. The cell lysates were further fractionated using the Bioruptor  
203 sonicator (5 min, 30 sec on/off pulses). Cell lysates were loaded onto 8% sodium dodecyl  
204 sulfate polyacrylamide electrophoresis gel and subjected to Western blot analysis by using  
205 antibodies against EBV proteins (1:1000 dilution). Following antibodies were used: anti-EBV  
206 EBNA1 (Santa Cruz Biotechnology (SCB), Santa Cruz, CA, USA), anti-EBV BZLF1 (SCB),  
207 EA-D (SCB), anti-LMP1 (SCB) and anti-GAPDH (Cell Signaling Technology, Danvers, MA,  
208 USA), Horseradish peroxidaseconjugated sheep anti-mouse IgG (Genetex, Irvine, CA, USA),  
209 horseradish peroxidase conjugated donkey anti-rabbit IgG (Genetex), and horseradish  
210 peroxidase-conjugated goat anti-rat IgG (Bethyl Laboratories, Montgomery, TX, USA) were  
211 used as secondary antibodies.

212

### 213 **Immunofluorescence Assay**

214 HEK293-EBV B(+/-) S13<sup>+/-</sup> (B(+)S13<sup>+</sup>, B(+)S13<sup>-</sup>, B(-)S13<sup>+</sup>, B(-)S13<sup>-</sup>) cells were  
215 grown on coverslips in 24-well plates ( $2 \times 10^5$ /well). Next day, cells were fixed with 4 %  
216 paraformaldehyde for 30 min and were permeabilized with 0.25 % Triton X-100 in PBS for  
217 90 min. Treated cells were blocked using 1 % BSA in PBS containing 0.1 % Tween 20 for 60  
218 min. Sample were stained with EBNA1 antibody (1 : 40). After overnight incubation at 4 °C,  
219 coverslips were washed 3X in PBS and treated with Alexa-594 (Thermo Fisher Scientific,  
220 Waltham, MA) for 2 h at 4 °C. Alexa-594 was used to detect EBNA1. After washing 3X in  
221 PBT (PBS containing 0.5 % Triton X-100), coverslips were mounted with DAPI  
222 (SouthernBiotech, Birmingham, AL). Samples were analyzed using immunofluorescence

223 confocal microscopy.

224

## 225 **CTCF ChIP-seq analysis**

226           ChIP-seq against CTCF was performed with  $5 \times 10^7$  SNU719 cells per sample and  
227 crosslinked using formaldehyde. Crosslinked SNU719 cell lysates was sonicated to achieve a  
228 DNA fragment length of  $\sim 100 - 500$  bp. Immunoprecipitation was carried out was carried  
229 out with  $10 \mu\text{g}$  of either rabbit anti-CTCF (Millipore, Burlington, MA, USA) or control rabbit  
230 IgG (SCB), incubated overnight with antibody-coated Dynabeads protein A/G (Invitrogen).  
231 Incubated beads were washed with ChIP-seq wash buffer (50 mM HEPES, pH 7.5, 500 mM  
232 LiCl, 1 mM EDTA, 1% NP-40, 0.7% Na-Deoxycholate, 1x protease inhibitors) for 5 times,  
233 then washed once with 50 mM NaCl in TE buffer. Immunoprecipitated DNA was eluted with  
234 ChIP-seq elution buffer (50 mM Tris-HCl, pH 8, 10 mM EDTA, 1% SDS), reverse-  
235 crosslinked at  $65^\circ\text{C}$ , treated with RNase A (0.2 mg/ml) and proteinase K (0.2 mg/ml), purified  
236 with phenol and chloroform, then subjected to qPCR validation. Validated ChIP samples were  
237 isolated by agarose gel purification, ligated to primers, and then subject to Illumina-based  
238 sequencing using manufacturer's protocol (Illumina, San Diego, CA, USA). ChIP-seq reads  
239 were mapped to the EBV wide-type reference genome (NC 007605) using Bowtie. For peak  
240 calling findPeaks command in Homer software was applied [39].

241

## 242 **ChIP assay**

243           CTCF or Cohesin ChIP assays were performed with  $3 \times 10^6$  SNU719 cells or  
244 HEK293-EBV B(+/-) S13<sup>+/-</sup> (B(+)S13<sup>+</sup>, B(+)S13<sup>-</sup>, B(-)S13<sup>+</sup>, B(-)S13<sup>-</sup>) cells per sample  
245 according to the cross-linking chromatin immunoprecipitation (X-ChIP) protocol provided by

246 Abcam (Cambridge, UK) with a slight modification. The Bioruptor (BMS, Korea) was used  
247 to sonicate genomic DNA according to the manufacturer's protocol. Sonicated cell lysates  
248 were subjected to immunoprecipitation with antibodies to CTCF (Millipore), SMC1 (Bethyl  
249 Laboratories, Montgomery, TX, USA), SMC3 (Bethyl Laboratories) and normal rabbit IgG  
250 (SCB). The precipitates were incubated with ChIP elution buffer (1% SDS, 100  
251 mMNaHCO<sub>3</sub>); then the samples were reverse-crosslinked at 65°C overnight and purified on  
252 Promega columns. The purified DNA was analyzed using RT-qPCR. ChIP values were  
253 calculated as fold increases over the isotype specific IgG values for each primer sets.

254

### 255 **3C and 4C-seq assays**

256 Chromatin confirmation capture (3C) and circular chromatin confirmation capture  
257 (4C)-seq assays were performed as previously reported [40]. Briefly, 1 x 10<sup>7</sup> SNU719 cells  
258 were fixed in 1% paraformaldehyde for 10 min at 37 °C. Nuclei were permeabilized by  
259 incubation with 0.5% SDS at 62 °C for 10 min. A half of DNA was digested with 100 units  
260 of *XhoI* (New England Biolabs (NEB), Ipswic, MA, USA) and ligated in the nucleus followed  
261 by in situ 3C protocol [41]. Other half of DNA was digested with 100 units of *MboI* (NEB)  
262 and ligated in the nucleus followed by in situ Hi-C protocol [42]. After reversal of crosslinks,  
263 3C DNA was prepared and examined the association between two genomic loci by using 3C  
264 primers. For 4C-seq, DNA was digested with 100 units of *MboI* (NEB) and ligated in the  
265 nucleus followed by in situ Hi-C protocol [42]. 3C DNA was further digested with 100 units  
266 of *Csp6I* (NEB) and re-ligated. For each primer viewpoint, a total 10 to 100 ng DNA was  
267 amplified by PCR. All samples were sequenced with NovaSeq 6000 100 bp paired read. 4C-  
268 seq experiments from all viewpoints were carried out in biological replicates for SNU719

269 cells.

270

#### 271 **4C-seq data analysis**

272 The 100-bp sequence paired-end reads were trimmed and grouped by cutadapt  
273 (version 2.10) based on the sequence from 4C bait location. Reads were aligned to EBV  
274 genome (NC\_007605) using Bowtie2 (version 2.2.3) with iterative alignment strategy. Reads  
275 with low mapping quality (MapQ < 10) and reads that mapped to human repeat sequences  
276 were removed. Total aligned reads for each *i*-th position of non-overlapping 10-kb window  
277 ( $N_i$ ) were calculated. Then, converted to the *P*-values using the Poisson formula:

$$278 \quad P_i = 1 - \sum_{j=0}^{N_i} \frac{N_i!}{j!} \lambda^j e^{-\lambda} \quad P_i = 1 - \sum_{j=0}^{N_i} \frac{N_i!}{j!} \lambda^j e^{-\lambda} \quad (1)$$

279

280

281

282 where  $\lambda$  is equal to the average of reads for each 10-kb window (except EBV aligned  
283 reads). The significant peaks were defined using subcommand bdgpeakcall of MACS2  
284 software (version 2.1.1) with parameters: at least *P*-value <  $10^{-5}$  (option -c 5), minimum  
285 length of 20-kb (option -l 20000) and maximum gap of 10-kb (option -g 10000). Total  
286 significant peak number for each 10-kb of bait positions (2 BART, FR, DS/Cp, Qp, LMP)  
287 were counted.

288

#### 289 **EBV infection study**

290  $6.3 \times 10^5$  HEK293-EBV B(+/-) S13<sup>+/-</sup> (B(+)S13<sup>+</sup>, B(+)S13<sup>-</sup>, B(-)S13<sup>+</sup>, B(-)S13<sup>-</sup>) cells  
291 were seeded on 6-cm culture dish. On next day, HEK293-EBV B(+/-) S13<sup>+/-</sup> cells were  
292 transfected with pCDNA3-BZLF1 and pCDNA3-BALF4 using TurboFect Transfection

293 Reagent (Thermo Scientific, Waltham, MA, USA). Old medium was changed with fresh  
294 medium in one day post transfection. Medium was harvested in three days post transfection.  
295 Harvested medium was then clarified by twice centrifugation at 3000 rpm and once filtering  
296 with 0.45  $\mu$ L filter (Sartorius stedium biotech, Gottingen, Germany). Next,  $3 \times 10^5$  HEK293  
297 cells were plated on a well of 6-well culture plate. In next day, old medium was removed from  
298 the HEK293 cells. 40  $\mu$ m cell strainer (FALCON, Corning, NY, USA) was loading on the  
299 HEK293 cells and refilled with the clarified old medium harvested from HEK293-EBV B(+/-)  
300 S13<sup>+/-</sup> cells. EBV infection was occurred from the clarified medium to HEK293 cells through  
301 cell strainer for 24 h.

302

### 303 **Statistical Analysis**

304 Statistical tests were performed using unpaired t-test and ANOVA. P-values (one-  
305 tailed)  $<0.05$  (95% confidence) were considered statistically significant.

306

307

## 308 **Results**

### 309 **Distribution of CTCF binding site (BS) in BART<sup>+</sup> EBV genome**

310 ChIP-seq was performed to identify CTCF BS in the EBV genome of EBVaGC  
311 SNU719 cells. The sequencing reads were mapped to the EBV reference genome  
312 (NC\_007605) and were visualized using the Homer tools [39]. Approximately  $5.7 \times 10^4$  CTCF  
313 ChIP reads and  $2.7 \times 10^6$  IgG reads were aligned to EBV reference genome sequence and  
314 displayed reads on EBV genome using UCSC genome browser (Fig 1A). Enrichment of

315 CTCF ChIP products relative to IgG ChIP products was calculated and visualized as the lower  
316 bound of 95% confidence. 16 high-confidence peaks were identified based on a read depth.  
317 CTCF binding sites were enriched at *BNRF1* (S1), *BCRF1* locus (S2), *BPLF1* locus (S5),  
318 *BMRP1* locus (S8), *BRLF1* locus (S11), *BART (RPMS1)* locus (S13), and *LMPI/2* locus (S16).  
319 These peaks were located in control regions of EBV genes such as upstream or downstream  
320 of their transcriptional start sites. One peak, S13 is located close to the BART promoter region  
321 and within the intro of *RPMS1* gene. Given to its locations, we speculate that this CTCF  
322 binding site (S13) functions as a transcriptional regulator and/or DNA loop maker, which  
323 mediate transcriptional regulator via chromatin interactions in EBV genome. To confirm  
324 CTCF BSs identified from ChIP-seq analysis in SNU719 cells, we performed ChIP-qPCR  
325 assays with CTCF and cohesion antibodies in these same cells. Since cohesins often  
326 colocalize with CTCF sites [32], we also assayed cohesion binding at these sites (Fig. 1B and  
327 1C). CTCF and SMC1 strongly bound to most (four sites among tested five sites) CTCF BSs  
328 identified from ChIP-seq, while SMC3 was weakly bound to the CTCF BSs tested. In  
329 particular, CTCF and cohesins were more strongly recruited to S13 compared with other  
330 tested regions except S16. Taken together, all these results speculated that CTCF bound to  
331 S13 is likely to play dominant roles in chromatin interactions for EBV gene regulation in  
332 SNU719 cells.

333

#### 334 **The CTCF binding site in BART promoter region**

335 Functional roles of CTCF BSs in EBV genome have been identified in EBV-  
336 associated lymphoid cells, such as Mutu I, Mutu-LCL, and Raji. CTCF BSs such as S1, S2,  
337 S5, and S16 in Fig.1A were characterized in previous studies and implicated in forming

338 looping structure [41, 43, 44]. However, S13 (BARTp CTCF BS) was not previously  
339 characterized. To understand the role of CTCF binding at S13, we first validated that S13  
340 bound directly to a CTCF protein from Sf9 cells using baculovirus CTCF expression system  
341 (Fig. 2B). To validate the specific sequence recognition site for CTCF, we used site-directed  
342 mutation to introduce mutations predicted to disrupt CTCF binding to S13 (Fig. 2A). We  
343 conducted microscale thermophoresis (MST) assay to confirm CTCF binding to wild-type  
344 (Wt) S13 and mutated (Mt) S13 DNA fragments (Fig. 2C). We observed strong binding of  
345 CTCF to Wt S13 DNA fragments that were significantly compromised for binding to Mt S13  
346 DNA fragments (Fig. 2C lower panel). As control, total proteins isolated from Sf9 cells  
347 showed no strong selectivity in binding to Wt S13 or Mt S13 DNA fragments (Fig. 2C upper  
348 panel). These data indicated that Wt S13 is a good target site for CTCF binding and suitable  
349 for BARTp CTCF BS.

350

### 351 **Chromatin interaction between CTCF BS in BART<sup>+</sup> EBV genome**

352 To examine if BARTp CTCF BS (S13) is required for the formation of DNA  
353 looping structure, 4C-seq was conducted at around BARTp CTCF BS in SNU719 cells.  
354 Nucleus isolated from SNU719 cells were permeabilized, DNA-digested, and ligated to make  
355 4C-seq products. Amplicons of 4C-seq products from view point primers were sequenced  
356 followed by aligning resultant sequencing reads to EBV genome (Fig. 3A). This 4C-seq data  
357 showed that the specific CTCF BS at S13 was involved in several chromatin interactions with  
358 multiple loci (Fig. 3B and 3C). Since CTCF binding site S14 is also located in the BART  
359 locus, we included S14 interactions along with S13. We found that BARTp CTCF BS (S13-  
360 S14, *RPMS1*) interacted strongly with several regions of the EBV genome, including regions



361 at the EBV genome coordinates 5-kb region (S1, *BNRF1*=TP), 45-kb region (S4, *BPLF1*),  
362 105-kb region (S12, *BKRF4*), and 155-kb regions (S15, *BALF4*) on the EBV genome. In  
363 particular, BARTp CTCF BS showed relatively strong interactions with both 45-kb region  
364 (S4) and 105-kb region (S12) except neighboring 155-kb region (S15). We also assayed  
365 interactions with other EBV regulatory elements using 4C-seq. OriP CTCF BS (S2) showed  
366 the strongest interactions its neighboring region at 5-kb (S1) and at 45-kb (S4). Qp CTCF BS  
367 (S5) interacted strongly with 145-kb region (S14), and LMP1/2 CTCF BS (S16) showed the  
368 strongest interaction with 55-kb region (S6). Duplicate experiments produced highly  
369 reproducible findings (Fig. 3C). These mutual chromatin interactions were depicted as a  
370 simple diagram (Fig. 3D). These results indicated that CTCF sites mediate DNA interactions  
371 throughout the EBV genome, and that BARTp CTCF BS intensively forms a cluster of several  
372 DNA loops with other important loci in the EBV genome of SNU719 cells.

373

#### 374 **Confirmation of chromatin interactions mediated BARTp CTCF BS**

375 3C assay was conducted to consolidate diverse chromatin interactions identified by  
376 4C-seq. Nucleuses isolated from SNU719 cells were subjected to paraformaldehyde-fixation,  
377 *XhoI*-digestion, T4 DNA ligase-ligation, and (nested) PCR. BARTp CTCF BS was included  
378 in an EBV DNA fragment cut by *XhoI* at 135,936 bp (135K, S13) and 147,676 bp (147K,  
379 S14) in EBV genome. Both ends of the 135K-147K DNA fragment were used as view point  
380 primers in PCR with 3C products (Fig. 4A). A view point primer designed from 147K (S14)  
381 in forward direction was first tested for chromatin interactions with other important loci in  
382 EBV genome (Fig. 4B). 147K (S14) locus could clearly interact with 3K (S1, *BNRF1*), 49K  
383 (S5, *BFRF3*), and 167K (S16, *LMP1/2*) loci. A second view point primer designed from 135K

384 (S13) in reverse direction was found to interact with 65K (S8, BORL2) and 167K (S16,  
385 LMP1/2) loci. All chromatin interactions were summarized in table (Fig. 4D) and simply  
386 depicted as a simple diagram (Fig. 4E). Taken together, all these 3C data indicated that  
387 BARTp CTCF BS is involved in forming a cluster composed of at least three DNA loops with  
388 OriP CTCF BS (S2), Qp CTCF BS (S5), and LMP1/2 CTCF BS (S16), respectively.

389

### 390 **Establishment of HEK293-EBV BART<sup>-</sup> and BART<sup>+</sup> BARTp CTCF BS mutant cells**

391 EBV B(+) and B(-) (B(+/-)) genome sequences were compared in previous study [45].  
392 This comparison revealed both loss of 11.8-kb BART region in EBV B(-) genome still  
393 retained the BARTp CTCF BS (S13) similar to EBV B(+) genome (Supplemental Fig. 1A).  
394 As BARTp CTCF BS is located in *RPMS1* intron region, an introduction of site-directed  
395 mutation in BARTp CTCF BS would not affect the *RPMS1* expression (Supplemental Fig.  
396 1B). Resultant EBV B(+) S13<sup>-</sup> bacmid from red-recombination was confirmed the site-  
397 directed mutation in BARTp CTCF BS by Sanger DNA sequencing (Supplemental Fig. 1C).  
398 In parallel, EBV B(-) S13<sup>-</sup> bacmid was also confirmed the mutation by Sanger DNA  
399 sequencing (data not shown). Thereafter, EBV B(+/-) S13<sup>+/-</sup> (B(+)S13<sup>+</sup>, B(+)S13<sup>-</sup>, B(-)S13<sup>+</sup>,  
400 B(-)S13<sup>-</sup>) bacmids were further tested their stabilities by EcoR1-digestion. Using these  
401 methods, we did not find any additional loss of EBV DNA (Supplemental Fig. 1D), nor  
402 defects in their ability to express GFP after several passages (Supplemental Fig. 1E).

403

### 404 **Effects of BARTp CTCF BS mutation on EBV infection**

405 EBV B(+/-) S13<sup>+/-</sup> (B(+)S13<sup>+</sup>, B(+)S13<sup>-</sup>, B(-)S13<sup>+</sup>, B(-)S13<sup>-</sup>) bacmid genomes were

406 tested for their EBV infectivity to HEK293 cells. To this aim, HEK293-EBV B(+/-) S13<sup>+/-</sup>  
407 cells were transfected with pcDNA3-BZLF1 and pcDNA3-BALF4. B(+/-) S13<sup>+/-</sup> EBVs were  
408 harvested three days post transfection (Fig. 5A). Harvested viruses were tested their  
409 infectivity to HEK293 cells as mentioned above (Fig. 5B and 5C). Interestingly, both B(+)  
410 S13<sup>-</sup> and B(-) S13<sup>-</sup> EBVs were severely defected in their infectivity to HEK293 cells,  
411 compared to B(+) and B(-) S13<sup>+</sup> EBVs. Furthermore, B(-) S13<sup>+</sup> EBV persisted longer in  
412 HEK293 cells than B(+) S13<sup>+</sup> EBVs. Taken together, these results indicated that BARTp  
413 CTCF BS, not the BART transcript, is required to maintain a full capacity of EBV  
414 infectivity.

415

#### 416 **Effects of BARTp CTCF BS mutation on EBV gene expression**

417 We further investigated overall expression patterns of EBV genes in HEK293-EBV  
418 B(+/-) S13<sup>+/-</sup> (B(+)S13<sup>+</sup>, B(+)S13<sup>-</sup>, B(-)S13<sup>+</sup>, B(-)S13<sup>-</sup>) cells. The mRNA levels of *EBNA1*,  
419 *LMP2*, *BZLF1* were significantly lower in B(+/-) S13<sup>-</sup> EBVs than B(+/-) S13<sup>+</sup> EBVs (Fig. 6A  
420 and 6B). Consistently, the protein levels of *EBNA1*, *LMP2*, *BZLF1* were significantly lower  
421 in B(+/-) S13<sup>-</sup> EBVs than B(+/-) S13<sup>+</sup> EBVs (Fig. 6C and 6D). Intracellular *EBNA1*  
422 expression was also weaker in B(+/-) S13<sup>-</sup> EBVs than B(+/-) S13<sup>+</sup> EBVs which were  
423 visualized by immunofluorescence assay (Fig. 6E). Taken together, these results indicated  
424 that BARTp CTCF BS is required to maintain appropriate expression levels of EBV genes  
425 during their latent infection.

426

#### 427 **Effect of 11.8-kb BART region on CTCF enrichment around BARTp CTCF BS**

428           Given the location of 11.8-kb BART region, we tested if 11.8-kb BART region can  
429   make regulatory effect to enrich CTCF on BARTp CTCF BS (S13) surrounding regions. For  
430   this aim, CTCF ChIP assay was performed to verify spatial effect of the BART region on the  
431   CTCF BSs to EBV genome. HEK293-EBV B(+/-) S13<sup>+/-</sup> (B(+)S13<sup>+</sup>, B(+)S13<sup>-</sup>, B(-)S13<sup>+</sup>,  
432   B(-)S13<sup>-</sup>) cells were subjected to CTCF ChIP assay whose products were analyzed by real-  
433   time qPCR assays. As expected, CTCF was almost completely deprived from BARTp CTCF  
434   BS in B(+/-) S13<sup>-</sup> EBVs (Fig. 7A and 7B). Interestingly, in other CTCF BSs surrounding  
435   BARTp CTCF BS, CTCF was differently distributed between B(+) S13<sup>-</sup> EBV and B(-) S13<sup>-</sup>  
436   EBV (Fig. 7A and 7B). Compared to B(+/-) S13<sup>+</sup> EBVs, CTCF was further enriched at other  
437   CTCF BSs around OriP (S2) and LMP1/2 (S16) in B(-) S13<sup>-</sup> EBV, while CTCF was severely  
438   deprived at those sites in B(+) S13<sup>-</sup> EBV. These ChIP products were further analyzed to  
439   reconfirm CTCF distribution by semi-quantitative (sq) PCR assay (Fig. 7C and 7D). It was  
440   also observed that the enrichment and deprivation of CTCF occurred at CTCF BSs around OriP  
441   and LMP1/2 dependent on absence and presence of BART, respectively. Taken together,  
442   these results from ChIP-(s)qPCR assays indicated that 11.8-kb BART region plays an  
443   important role in enriching CTCF at other CTCF BSs surrounding BARTp CTCF BS to  
444   regulate appropriate EBV genome 3D structure.

445

#### 446 **BARTp CTCF-mediates chromatin interactions**

447           Since BARTp CTCF BS (S13) was implicated to differently distribute CTCF on its  
448   surrounding CTCF BSs, we tested whether BARTp CTCF BS might play a regulatory role in  
449   forming a cluster of several DNA loops mediated by BARTp CTCF BS. To this aim, 3C-  
450   sqPCR assays with HEK293-EBV B(+/-) S13<sup>+/-</sup> (B(+)S13<sup>+</sup>, B(+)S13<sup>-</sup>, B(-)S13<sup>+</sup>, B(-)S13<sup>-</sup>)

451 cells were conducted to consolidate chromatin interactions in similar way previously done  
452 with SNU719 cells in Fig. 4. Nuclei isolated from HEK293-EBV B(+/-) S13<sup>+/-</sup> cells were  
453 subjected to 3C-sqPCR assay. Multiple chromatin interactions mediated by BARTp CTCF  
454 BS with loci such as OriP, Qp, and LMP1/2 were confirmed in HEK293-EBV B(+/-) S13<sup>+</sup>  
455 cells (Fig. 8A). Like SNU719 cells, it was observed that 147K (S14) interacts with 3K (S1)  
456 and 167K (S16) regardless of 11.8-kb BART region. In spite of this similarity, both 167K-  
457 147K and 65K-147K interactions were slightly stronger in B(+) S13<sup>+</sup> EBV and B(-) S13<sup>+</sup>  
458 EBV. However, the site-directed mutation in BARTp CTCF BS caused to disrupt most  
459 chromatin interactions observed in B(+/-) S13<sup>+</sup> EBVs (Fig. 8B). However, B(+/-) S13<sup>-</sup> EBVs  
460 could not maintain almost the whole chromatin interactions directly associated with BARTp  
461 CTCF BS (Fig. 8B). The B(+/-) S13<sup>-</sup> EBVs were not observed a specific chromatin interaction  
462 such as 65K (S8)-147K(S14). In spite of severe loss of chromatin interactions, some  
463 chromatin interactions indirectly associated with BARTp CTCF BS was relatively less  
464 affected in B(-) S13<sup>-</sup> EBV. These indirectly associated chromatin interactions such as 3K-  
465 167K and 65K-147K were maintained in B(-) S13<sup>-</sup> EBV although those interactions were  
466 abolished in B(+) S13<sup>-</sup> EBV (Fig. 8B). All tested chromatin interactions were summarized in  
467 table (Fig. 8C) and depicted as simple diagrams (Fig. 8D). Given these data, BARTp CTCF  
468 BS (S13) could centralize key chromatin interactions among OriP, Qp, and LMP1/2. The  
469 11.8-kb BART region could make structural effects on forming a key DNA loop cluster via  
470 BARTp CTCF BS-mediated chromatin interactions.

471

## 472 **Discussion**

473 Gene regulation requires integration of various signals and coordination of these  
474 signals across the genome. EBV gene expression is controlled at multiple levels, including  
475 transcription factor binding, transcription initiation and elongation, RNA processing, and  
476 epigenetic modification that control latent and lytic transcription [6]. In each of these context,  
477 CTCF-mediated chromatin interaction has played key roles in regulating EBV gene  
478 expression. CTCF BSs at *OriP* (S2 [46]), *Qp* (S5 [41]), and *LMPI/2* (S16 [43]) have been  
479 characterized their functional roles in regulating EBV gene expression. Most of these previous  
480 studies focused on EBV genomes in Burkitt's lymphoma (BL) or lymphoblastoid cell lines  
481 (LCLs). Although 11.8-kb BART region was well conserved in EBV-associated Raji, Mutu,  
482 and GC1 cells, few genetic studies were conducted to define miRNAs in 11.8-kb BART  
483 region [38]. In particular, BARTp CTCF BS (S13) in gastric carcinoma cells has not been  
484 characterized its functional roles in regulating EBV gene expression.

485 Here, we first showed that BARTp CTCF BS (S13) can form a cluster of DNA loops  
486 via chromatin interactions mediated with several CTCF BSs such as *OriP*, *Qp*, and *LMPI/2*.  
487 Secondly, we found that functional BARTp CTCF BS (S13) is required to make a stable DNA  
488 loop between *OriP* and *LMPI/2*. Thirdly, we showed that BARTp CTCF BS (S13) is an  
489 important site of transcriptional regulation of EBV genes such as *EBNA1* and *BZLF1*. Finally,  
490 we found that functional BARTp CTCF BS (S13) is necessary for a full capacity of EBV  
491 infection. These findings suggested that BARTp CTCF BS (S13) coordinates EBV gene  
492 expression via forming interactions with other CTCF BSs in the viral genome.

493 CTCF has been previously implicated with cohesins in chromatin interactions by  
494 forming DNA loops [47]. Long-distance DNA interactions are essential to mediate  
495 communication between promoter and enhance elements. EBV OriP has been implicated as a

496 transcriptional enhancer of *Cp* and *LMP1* promoter whose mechanism was to use the CTCF-  
497 mediated DNA loop structure [48]. In the present study, we examined the role of CTCF at the  
498 BARTp (S13) using EBV-associated gastric carcinoma cells and EBV infected HEK293 cells.  
499 We found that deletion of the BARTp CTCF BS (S13) in B(-) EBV genome resulted in more  
500 enrichment of CTCF at CTCF BSs in *OriP* and *LMP1/2*, while the deletion in B(+) EBV  
501 caused to deprive almost all the CTCF from CTCF BSs in *OriP* and *LMP1/2*. In similar  
502 context, the chromatin interactions of *OriP* and *LMP1/2* was more severely defected in EBV  
503 B(+) S13<sup>-</sup> genome than EBV B(-) S13<sup>-</sup> EBV genome due to the differential distribution of  
504 CTCF. These results suggested that 11.8-kb BART region could make spatial effects on  
505 forming CTCF-mediated DNA loops of *OriP* and *LMP1/2* loci.

506         Taken together, these results suggested that BARTp CTCF BS (S13) can play a  
507 complex role in regulating epigenetic modifications at both BART region and its surrounding  
508 regions such *LMP1/2* locus and *OriP* locus. One possible function of CTCF at the BARTp is  
509 to link *LMP1/2* locus, *OriP* locus, and *Qp* locus into a cluster of DNA loops. This genomic  
510 clustering would partly account for the role of CTCF in maintaining EBV latent infection.  
511 Similar to this present study, we previously observed that the chromatin interaction between  
512 *LANA* locus and *RTA* locus could occur to form a chromatin complex via CTCF during KSHV  
513 latent infection. In KSHV, these CTCF-mediated interactions were disrupted during KSHV  
514 lytic reactivation [49]. However, for EBV it is not yet known whether CTCF binding and  
515 genome conformation change during EBV latent-lytic switch.

516         CTCF has been implicated as a chromatin insulator and boundary factor [50, 51].  
517 CTCF can prevent epigenetic drift by blocking heterochromatin formation at the EBV *Qp*  
518 region [41]. Deletion of CTCF BS in *LMP1/2* resulted in disrupting *OriP* and *LMP1/2* locus

519 interaction, an increase in histone H3K9me3 and DNA methylation at LMP1 promoter region,  
520 and severe reduction of EBV latent infection [43]. In the present study, the deletion of CTCF  
521 BS in BARTp (S13) resulted in loss of *EBNA1* and *BZLF1* in mRNA and protein levels. In  
522 addition, the deletion caused to severely reduce EBV latent infection regardless of presence  
523 of 11.8-kb BART region. Thus, phenotype of BARTp CTCF BS (S13) mutant EBVs was  
524 similar to that of *LMPI/2* CTCF BS mutant EBV. One of possible mechanism is that BARTp  
525 CTCF might work together with *LMPI/2* CTCF to block the spread of heterochromatin that  
526 might be generated by GC-rich respective DNA of the EBV terminal repeat (TR) region.  
527 However, it remains to further study molecular mechanism that BARTp CTCF uses to  
528 coordinate with *LMPI/2* CTCF in blocking the spread of heterochromatin for EBV gene  
529 expression.

530         Recent studies using Hi-C methods examined EBV interactions with host  
531 chromosome in various cell types [40, 52]. Another related study used capture Hi-C to analyze  
532 KSHV looping DNA interactions during latency and reactivation, and found that DNA loops  
533 organized around highly active RNA polymerase II promoters, especially that for the viral  
534 PAN non-coding RNA [53]. In the present study, we used Hi-C method to define DNA  
535 looping interactions within EBV genome in EBVaGC and focused on the regions controlling  
536 the BART transcripts. Similar to KSHV PAN promoter, we found the EBV BART promoter  
537 to be an organizing hub for the EBV genome. While we did not examine RNA pol II binding,  
538 our findings indicate that CTCF-mediated chromatin interaction is likely to account for most  
539 DNA loops within EBV genomes. It is also possible that EBV association with host  
540 chromosome may also contribute to some aspects of EBV chromosome conformation.  
541 Although our high-resolution 4C analysis did reveal extensive conformational structure of



542 EBV genome during EBV latency in EBVaGC, further studies will be required to resolve  
543 some of these more complicated functions of CTCF and to better understand how EBV has  
544 exploited CTCF binding sites to confer coordinate gene regulation and genome propagation  
545 in latent infection.

546

## 547 **Disclosure of Potential Conflicts of Interest**

548 No potential conflicts of interest were disclosed by all authors.

549

## 550 **Author's Contributions**

551 Conception and design: H. Kang, H. Cho, S.

552 Development of methodology: H. Kang, K. Kim

553 Acquisition of data (provided animals, acquired and managed patients,

554 provided facilities, etc.): H. Kang, K. Kim, S. Cho, T. Kim, S. Huh, L. Kim

555 Analysis and interpretation of data (e.g., statistical analysis, biostatistics,

556 computational analysis): H. Kang, H. Cho, H. Tanizawa, J. Shin, Kyoung Jae Won

557 Writing, review, and/or revision of the manuscript: H. Kang, H. Cho, P. Lieberman

558 Administrative, technical, or material support (i.e., reporting or organizing

559 data, constructing databases): T. Kanda, P. Lieberman

560 Study supervision: H. Kang, H. Cho

561

## 562 **Grant Support**

563           This work was supported by 1) grants from the National Research Foundation of  
564 Korea (2018R1D1A3B07045094, 2019R1I1A3A01059629), 2) a grant from the Priority  
565 Research Centers Program through the National Research Foundation funded by the Korean  
566 Ministry of Education, Science, and Technology (2016R1A6A1A03007648), 3) a grant from  
567 the National Research Foundation of Korea grant funded by the Korean Government(MSIT)  
568 (2020R1A5A2017323), 4) the 4<sup>TH</sup> BK21 project (Educational Research Group for Platform  
569 development of management of emerging infectious disease) funded by the Korean ministry  
570 of education (5199990614732).

571

572

573

574

## 575 **Figure Legend**

576

577 **Fig 1. Identification of CTCF binding site on EBV genome in SUN719 cell line.** A) CTCF  
578 enrichment in the EBV genome of SNU719 cells was identified by CTCF ChIP-seq assay.  
579 ChIP-seq data in SNU719 cells were aligned to EBV reference genome (NC\_007605) for  
580 CTCF enrichment. Peak calling identifies 16 significant peaks in ChIP-seq signals.  
581 Approximate positions in EBV genome were indicated in the schematic with CTCF binding

582 sites and primer sets used for ChIP RT-qPCR. **B)** Resultant CTCF enrichments identified by  
583 ChIP-seq assay were confirmed through the CTCF ChIP-qPCR assay. The ChIP-qPCR was  
584 assayed with SNU719 cells using antibody for CTCF. EBV 38,173 primer set was used as  
585 negative control. **C)** Like CTCF ChIP-qPCR assay, cohesin subunits such as SMC1 and  
586 SMC3 were also tested their enrichment at CTCF BSs by the cohesin ChIP-qPCR assays.

587

588 **Fig 2. Detection of CTCF-DNA interaction using the Monolith NT.115.** **A)** S13 5' FAM  
589 labeled 49-mer primer whose sequence was mutated (Mt S13 primer sets) or not (Wt S13  
590 primer sets). **B)** Confirmation of CTCF quality by Western blot assay. CTCF was purified  
591 using Sf9 baculovirus protein expression system. Upper panel: Sf9 total protein, lower panel:  
592 purified CTCF protein. **C)** CTCF-DNA interaction tested by Microscale thermophoresis  
593 (MST) assay. Wt/Mt S13 5' FAM labeled 49-mer primer sets were paired to convert double  
594 DNA fragments. MST assays for CTCF binding to Wt/Mt S13 DNA fragments were  
595 conducted with 125 nM DNA fragments and 3.12  $\mu$ M or 6.25  $\mu$ M CTCF.

596

597 **Fig 3. 4C-plots on EBV genome.** **A)** The brief 4C experimental procedure and bait positions  
598 on EBV genome. Five genomic loci (2 BART, FR, DS/Cp, Qp, LMP) were used as baits. **B)**  
599 and **C)** The entire EBV genome was divided into 10-kb windows with each 10 bp sliding, and  
600 read numbers indicating associations between the bait regions and 10-kb sections were plotted  
601 (top). The experiments are duplicated. **D)** Simple summary of multiple chromatin interactions  
602 mediated by CTCF BSs, given to 4C-seq assay data.

603

604 **Fig 4. Confirmation of chromatin interaction by 3C-semi-quantitative (sq)PCR assay.**  
605 **A)** Sites of *XhoI* restriction sites and 3C-sqPCR primers on EBV genome. **B)** 3C-sqPCR assay  
606 using 147K (S14) region as a view primer. EBV genome in SNU719 cells were cut by *XhoI*  
607 restriction enzyme, ligated by T4 DNA ligase, and then purified as described previously.  
608 Resultant EBV genome DNA was subjected to 3C-sqPCR assay. **C)** 3C-sqPCR assay using  
609 135K (S13) region as a view primer. **D)** Summary of 3C-sqPCR assay data in table. O and o  
610 stand for strong and weak chromatin interactions, respectively. x stands for no detection. **E)**  
611 A simple diagram to indicate a DNA loop cluster mediated by BARTp CTCF BS associated  
612 chromatin interactions in SNU719 cells.

613

614 **Fig 5. EBV infection assay. A)** Schematic diagram of EBV infection assay. HEK293-EBV  
615 B(+/-) S13<sup>+</sup> (Wt) and S13<sup>-</sup> (Mt) cells were transfected with pCDNA3-BZLF1 and pcDNA3-  
616 BALF4. In three days post transfection, supernatants of transfected HEK293-EBV B(+/-)  
617 S13<sup>+/-</sup> (Wt/Mt) cells were harvested and loaded on HEK293 cells freshly cultured on 6-well  
618 plate where cell strainer was equipped. EBV in harvested supernatants would infect HEK293  
619 cells for 24 h. After infection, GFP from HEK293 cells infected by EBV was detected in  
620 series of time points. **B)** Infection assay of B(-) S13<sup>+/-</sup> (Wt/Mt) EBVs to HEK293 cells. **C)**  
621 Infection assay of B(+/-) S13<sup>+/-</sup> (Wt/Mt) EBVs to HEK293 cells.

622

623 **Fig 6. EBV gene expression in BARTp CTCF BS mutant EBVs. A)** RT-quantitative  
624 (q)PCR assay was conducted to define profiles of EBV gene expression in HEK293-EBV  
625 B(-) S13<sup>+/-</sup> (Wt/Mt) cells. **B)** The mRNA expression profile was defined in HEK293-EBV  
626 B(+) S13<sup>+/-</sup> (Wt/Mt) cells. **C)** Western blot assay to compare EBV protein expressions

627 between HEK293-EBV B(-) S13<sup>+</sup> (Wt) and S13<sup>-</sup> (Mt) cells. **D)** Western blot assay to compare  
628 EBV protein expressions between HEK293-EBV B(+) S13<sup>+</sup> (Wt) and S13<sup>-</sup> (Mt) cells. **E)**  
629 EBNA1 expressions in HEK293-EBV B(+/-) S13<sup>+/-</sup> (Wt/Mt) cells were compared by  
630 immunofluorescence assay. Representative images for interphase nuclei stained with EBNA1  
631 and Alexa flour 594 were shown.

632

633 **Fig. 7. CTCF enrichment in HEK293-EBV B(+/-) S13<sup>+/-</sup> cells.** **A)** CTCF binding affinities  
634 were measured by CTCF ChIP-qPCR assay in HEK293-EBV B(-) S13<sup>+/-</sup> (Wt/Mt) cells. **B)**  
635 CTCF binding affinities were measured by CTCF ChIP-qPCR assay in HEK293-EBV B(+)  
636 S13<sup>+/-</sup> (Wt/Mt) cells. **C)** CTCF ChIP products from HEK293-EBV B(-) S13<sup>+/-</sup> (Wt/Mt) cells  
637 were confirmed their enrichments using sqPCR. **D)** CTCF ChIP products from HEK293-EBV  
638 B(+) S13<sup>+/-</sup> (Wt/Mt) cells were confirmed their enrichments using sqPCR assay.

639

640 **Fig 8. Confirmation of chromatin interaction affected by BARTp CTCF BS mutation.**  
641 **A)** and **B)** Sites of *XhoI* restriction sites and 3C primers on EBV genome. EBV genome in  
642 HEK293-B(-) S13<sup>+/-</sup> (Wt/Mt) EBV cells. were cut by *XhoI* restriction enzyme, ligated by T4  
643 DNA ligase, and then purified as described previously. Resultant EBV genome DNA was  
644 subjected to 3C semi-quantitative PCR assay with view-point primers designed around 147K  
645 and 135K, respectively. **C)** Summary of 3C assays. O and o stand for strong and weak  
646 chromatin interactions, respectively. X stands for no detection. **D)** Simple diagrams to indicate  
647 a DNA loop cluster mediated by BARTp CTCF BS associated chromatin interactions in  
648 HEK293-EBV B(+/-) S13<sup>+/-</sup> (Wt/Mt) cells.

649

650 **Supplemental Fig 1. Construction of HEK293-EBV B(+/-) S13<sup>-</sup> cells.** **A)** Schematic  
651 diagram of EBV B(+/-) S13<sup>+</sup> (Wt/Mt) bacmids. **B)** Sequences introduced at points of  
652 recombination to make site-directed mutations in BARTp CTCF BS. **C)** Confirmation of the  
653 site-directed mutation in BARTp CTCF BS in EBV B(+) S13<sup>-</sup> (Mt) bacmid BY Sanger DNA  
654 sequencing. In parallel, EBV B(-) S13<sup>-</sup> (Mt) bacmid was also confirmed the mutation by  
655 Sanger DNA sequencing (data not shown). **D)** Gel electrophoresis to check EBV genome  
656 stabilities of EBV B(+) S13<sup>-</sup> (Mt) bacmids by *EcoRI* digestion; EBV B(+) S13<sup>+</sup> (Wt) bacmid  
657 (lane 1), EBV B(+) S13<sup>-</sup> bacmid-*Kan<sup>r</sup>* with 1<sup>st</sup> recombination (lane 2), and EBV B(+) S13<sup>-</sup>  
658 (Mt) bacmid with 2<sup>nd</sup> recombination (lane 3). We could not find any loss in EBV B(+) S13<sup>-</sup>  
659 (Mt) bacmid. In parallel, EBV B(-) S13<sup>-</sup> (Mt) bacmid was also confirmed their stabilities  
660 without any loss (data not shown). **E)** HEK293 cells were transfected with EBV B(+/-) S13<sup>+/-</sup>  
661 (Wt/Mt) bacmids and selected using hygromycin B to establish HEK293-EBV B(+/-) S13<sup>+/-</sup>  
662 (Wt/Mt) cells. GFP expression were determined in 40 days after hygromycin B selection and  
663 several passages. Established HEK293-EBV B(+/-) S13<sup>+/-</sup> (Wt/Mt) cells were confirmed to  
664 maintain their GFP expressions even after several passages.

665

## 666 **References**

- 667 1. Kieff E. Epstein-Barr Virus and Its Replication. 5th ed. Philadelphia, PA: Wolters Kluwer  
668 Health/Lippincott/The Williams & Wilkins Co; 2007.
- 669 2. Shibata D, Tokunaga M, Uemura Y, Sato E, Tanaka S, Weiss LM. Association of Epstein-  
670 Barr virus with undifferentiated gastric carcinomas with intense lymphoid infiltration.  
671 Lymphoepithelioma-like carcinoma. The American journal of pathology. 1991;139(3):469-74. Epub  
672 1991/09/01. PubMed PMID: 1653517; PubMed Central PMCID: PMCPMC1886210.
- 673 3. Thorley-Lawson DA, Allday MJ. The curious case of the tumour virus: 50 years of Burkitt's  
674 lymphoma. Nature Reviews Microbiology. 2008;6:913. doi: 10.1038/nrmicro2015.
- 675 4. Hung SC, Kang MS, Kieff E. Maintenance of Epstein-Barr virus (EBV) oriP-based episomes

- 676 requires EBV-encoded nuclear antigen-1 chromosome-binding domains, which can be replaced by  
677 high-mobility group-I or histone H1. *Proceedings of the National Academy of Sciences of the*  
678 *United States of America*. 2001;98(4):1865-70. Epub 2001/02/15. doi: 10.1073/pnas.031584698.  
679 PubMed PMID: 11172042; PubMed Central PMCID: PMCPMC29348.
- 680 5. Rowe M, Lear AL, Croom-Carter D, Davies AH, Rickinson AB. Three pathways of Epstein-  
681 Barr virus gene activation from EBNA1-positive latency in B lymphocytes. *J Virol*. 1992;66(1):122-  
682 31. Epub 1992/01/01. PubMed PMID: 1309242; PubMed Central PMCID: PMCPMC238267.
- 683 6. Chen H-S, Lu F, Lieberman PM. Epigenetic regulation of EBV and KSHV latency. *Current*  
684 *opinion in virology*. 2013;3(3):251-9. Epub 04/16. doi: 10.1016/j.coviro.2013.03.004. PubMed PMID:  
685 23601957.
- 686 7. Shibata D, Weiss LM. Epstein-Barr virus-associated gastric adenocarcinoma. *The American*  
687 *journal of pathology*. 1992;140(4):769-74. Epub 1992/04/01. PubMed PMID: 1314023; PubMed  
688 Central PMCID: PMCPMC1886378.
- 689 8. Nishikawa J, Yoshiyama H, Iizasa H, Kanehiro Y, Nakamura M, Nishimura J, et al. Epstein-  
690 barr virus in gastric carcinoma. *Cancers*. 2014;6(4):2259-74. doi: 10.3390/cancers6042259. PubMed  
691 PMID: 25386788.
- 692 9. Takada K. Epstein-Barr virus and gastric carcinoma. *Molecular pathology : MP*.  
693 2000;53(5):255-61. PubMed PMID: 11091849.
- 694 10. Imai S, Koizumi S, Sugiura M, Tokunaga M, Uemura Y, Yamamoto N, et al. Gastric  
695 carcinoma: monoclonal epithelial malignant cells expressing Epstein-Barr virus latent infection  
696 protein. *Proceedings of the National Academy of Sciences of the United States of America*.  
697 1994;91(19):9131-5. Epub 1994/09/13. PubMed PMID: 8090780; PubMed Central PMCID:  
698 PMCPMC44761.
- 699 11. Chen H, Huang J, Wu FY, Liao G, Hutt-Fletcher L, Hayward SD. Regulation of expression  
700 of the Epstein-Barr virus BamHI-A rightward transcripts. *J Virol*. 2005;79(3):1724-33. Epub  
701 2005/01/15. doi: 10.1128/jvi.79.3.1724-1733.2005. PubMed PMID: 15650197; PubMed Central  
702 PMCID: PMCPMC544122.
- 703 12. Chen HL, Lung MM, Sham JS, Choy DT, Griffin BE, Ng MH. Transcription of BamHI-A  
704 region of the EBV genome in NPC tissues and B cells. *Virology*. 1992;191(1):193-201. Epub  
705 1992/11/01. PubMed PMID: 1329317.
- 706 13. Cheung ST, Huang DP, Hui AB, Lo KW, Ko CW, Tsang YS, et al. Nasopharyngeal carcinoma  
707 cell line (C666-1) consistently harbouring Epstein-Barr virus. *International journal of cancer*.  
708 1999;83(1):121-6. Epub 1999/08/17. PubMed PMID: 10449618.
- 709 14. Cullen BR. Transcription and processing of human microRNA precursors. *Molecular cell*.  
710 2004;16(6):861-5. Epub 2004/12/22. doi: 10.1016/j.molcel.2004.12.002. PubMed PMID: 15610730.
- 711 15. Gilligan K, Sato H, Rajadurai P, Busson P, Young L, Rickinson A, et al. Novel transcription  
712 from the Epstein-Barr virus terminal EcoRI fragment, DJH<sub>et</sub>, in a nasopharyngeal carcinoma. *J Virol*.

- 713 1990;64(10):4948-56. Epub 1990/10/01. PubMed PMID: 2168978; PubMed Central PMCID:  
714 PMCPMC247986.
- 715 16. Karran L, Gao Y, Smith PR, Griffin BE. Expression of a family of complementary-strand  
716 transcripts in Epstein-Barr virus-infected cells. *Proceedings of the National Academy of Sciences*  
717 *of the United States of America*. 1992;89(17):8058-62. Epub 1992/09/01. PubMed PMID: 1325642;  
718 PubMed Central PMCID: PMCPMC49855.
- 719 17. Edwards RH, Marquitz AR, Raab-Traub N. Epstein-Barr virus BART microRNAs are  
720 produced from a large intron prior to splicing. *J Virol*. 2008;82(18):9094-106. Epub 2008/07/11.  
721 doi: 10.1128/jvi.00785-08. PubMed PMID: 18614630; PubMed Central PMCID: PMCPMC2546912.
- 722 18. Raab-Traub N, Dambaugh T, Kieff E. DNA of Epstein-Barr virus VIII: B95-8, the previous  
723 prototype, is an unusual deletion derivative. *Cell*. 1980;22(1 Pt 1):257-67. Epub 1980/11/01.  
724 PubMed PMID: 6253079.
- 725 19. Kim DN, Chae H-S, Oh ST, Kang J-H, Park CH, Park WS, et al. Expression of viral microRNAs  
726 in Epstein-Barr virus-associated gastric carcinoma. *Journal of virology*. 2007;81(2):1033-6. Epub  
727 11/01. doi: 10.1128/JVI.02271-06. PubMed PMID: 17079300.
- 728 20. Zhu JY, Pfuhl T, Motsch N, Barth S, Nicholls J, Grasser F, et al. Identification of novel  
729 Epstein-Barr virus microRNA genes from nasopharyngeal carcinomas. *J Virol*. 2009;83(7):3333-41.  
730 Epub 2009/01/16. doi: 10.1128/jvi.01689-08. PubMed PMID: 19144710; PubMed Central PMCID:  
731 PMCPMC2655542.
- 732 21. Choy EY, Siu KL, Kok KH, Lung RW, Tsang CM, To KF, et al. An Epstein-Barr virus-encoded  
733 microRNA targets PUMA to promote host cell survival. *The Journal of experimental medicine*.  
734 2008;205(11):2551-60. Epub 2008/10/08. doi: 10.1084/jem.20072581. PubMed PMID: 18838543;  
735 PubMed Central PMCID: PMCPMC2571930.
- 736 22. Marquitz AR, Mathur A, Shair KHY, Raab-Traub N. Infection of Epstein-Barr virus in a  
737 gastric carcinoma cell line induces anchorage independence and global changes in gene  
738 expression. *Proceedings of the National Academy of Sciences*. 2012;109(24):9593.
- 739 23. Bushey AM, Dorman ER, Corces VG. Chromatin insulators: regulatory mechanisms and  
740 epigenetic inheritance. *Molecular cell*. 2008;32(1):1-9. Epub 2008/10/15. doi:  
741 10.1016/j.molcel.2008.08.017. PubMed PMID: 18851828; PubMed Central PMCID:  
742 PMCPMC2576288.
- 743 24. West AG, Gaszner M, Felsenfeld G. Insulators: many functions, many mechanisms. *Genes*  
744 *& development*. 2002;16(3):271-88. Epub 2002/02/05. doi: 10.1101/gad.954702. PubMed PMID:  
745 11825869.
- 746 25. Wallace JA, Felsenfeld G. We gather together: insulators and genome organization.  
747 *Current opinion in genetics & development*. 2007;17(5):400-7. Epub 2007/10/05. doi:  
748 10.1016/j.gde.2007.08.005. PubMed PMID: 17913488; PubMed Central PMCID: PMCPMC2215060.
- 749 26. Capelson M, Corces VG. Boundary elements and nuclear organization. *Biology of the cell*.



- 750 2004;96(8):617-29. Epub 2004/11/03. doi: 10.1016/j.biolcel.2004.06.004. PubMed PMID: 15519696.  
751 27. Filippova GN, Fagerlie S, Klenova EM, Myers C, Dehner Y, Goodwin G, et al. An  
752 exceptionally conserved transcriptional repressor, CTCF, employs different combinations of zinc  
753 fingers to bind diverged promoter sequences of avian and mammalian c-myc oncogenes.  
754 Molecular and cellular biology. 1996;16(6):2802-13. Epub 1996/06/01. PubMed PMID: 8649389;  
755 PubMed Central PMCID: PMCPMC231272.
- 756 28. Klenova EM, Nicolas RH, Paterson HF, Carne AF, Heath CM, Goodwin GH, et al. CTCF, a  
757 conserved nuclear factor required for optimal transcriptional activity of the chicken c-myc gene, is  
758 an 11-Zn-finger protein differentially expressed in multiple forms. Molecular and cellular biology.  
759 1993;13(12):7612-24. Epub 1993/12/01. PubMed PMID: 8246978; PubMed Central PMCID:  
760 PMCPMC364833.
- 761 29. Lobanenko VV, Nicolas RH, Adler VV, Paterson H, Klenova EM, Polotskaja AV, et al. A  
762 novel sequence-specific DNA binding protein which interacts with three regularly spaced direct  
763 repeats of the CCCTC-motif in the 5'-flanking sequence of the chicken c-myc gene. Oncogene.  
764 1990;5(12):1743-53. Epub 1990/12/01. PubMed PMID: 2284094.
- 765 30. Ohlsson R, Renkawitz R, Lobanenko V. CTCF is a uniquely versatile transcription regulator  
766 linked to epigenetics and disease. Trends in genetics : TIG. 2001;17(9):520-7. Epub 2001/08/30.  
767 PubMed PMID: 11525835.
- 768 31. Rubio ED, Reiss DJ, Welch PL, Distche CM, Filippova GN, Baliga NS, et al. CTCF physically  
769 links cohesin to chromatin. Proceedings of the National Academy of Sciences of the United States  
770 of America. 2008;105(24):8309-14. Epub 2008/06/14. doi: 10.1073/pnas.0801273105. PubMed PMID:  
771 18550811; PubMed Central PMCID: PMCPMC2448833.
- 772 32. Stedman W, Kang H, Lin S, Kissil JL, Bartolomei MS, Lieberman PM. Cohesins localize with  
773 CTCF at the KSHV latency control region and at cellular c-myc and H19/Igf2 insulators. The EMBO  
774 journal. 2008;27(4):654-66. Epub 2008/01/26. doi: 10.1038/emboj.2008.1. PubMed PMID: 18219272;  
775 PubMed Central PMCID: PMCPMC2262040.
- 776 33. Wendt KS, Yoshida K, Itoh T, Bando M, Koch B, Schirghuber E, et al. Cohesin mediates  
777 transcriptional insulation by CCCTC-binding factor. Nature. 2008;451(7180):796-801. Epub  
778 2008/02/01. doi: 10.1038/nature06634. PubMed PMID: 18235444.
- 779 34. Arvey A, Tempera I, Tsai K, Chen HS, Tikhmyanova N, Klichinsky M, et al. An atlas of the  
780 Epstein-Barr virus transcriptome and epigenome reveals host-virus regulatory interactions. Cell  
781 host & microbe. 2012;12(2):233-45. Epub 2012/08/21. doi: 10.1016/j.chom.2012.06.008. PubMed  
782 PMID: 22901543; PubMed Central PMCID: PMCPMC3424516.
- 783 35. Day L, Chau CM, Nebozhyn M, Rennekamp AJ, Showe M, Lieberman PM. Chromatin  
784 profiling of Epstein-Barr virus latency control region. J Virol. 2007;81(12):6389-401. Epub  
785 2007/04/06. doi: 10.1128/jvi.02172-06. PubMed PMID: 17409162; PubMed Central PMCID:  
786 PMCPMC1900095.

- 787 36. Holdorf MM, Cooper SB, Yamamoto KR, Miranda JJ. Occupancy of chromatin organizers  
788 in the Epstein-Barr virus genome. *Virology*. 2011;415(1):1-5. Epub 2011/05/10. doi:  
789 10.1016/j.virol.2011.04.004. PubMed PMID: 21550623; PubMed Central PMCID: PMC3808970.
- 790 37. Choi SJ, Ryu E, Lee S, Huh S, Shin YS, Kang BW, et al. Adenosine Induces EBV Lytic  
791 Reactivation through ADORA1 in EBV-Associated Gastric Carcinoma. *Int J Mol Sci*. 2019;20(6). doi:  
792 10.3390/ijms20061286. PubMed PMID: 30875759; PubMed Central PMCID: PMC6471230.
- 793 38. Kanda T, Miyata M, Kano M, Kondo S, Yoshizaki T, Iizasa H. Clustered microRNAs of the  
794 Epstein-Barr virus cooperatively downregulate an epithelial cell-specific metastasis suppressor. *J*  
795 *Virology*. 2015;89(5):2684-97. doi: 10.1128/JVI.03189-14. PubMed PMID: 25520514; PubMed Central  
796 PMCID: PMC4325718.
- 797 39. Heinz S, Benner C, Spann N, Bertolino E, Lin YC, Laslo P, et al. Simple combinations of  
798 lineage-determining transcription factors prime cis-regulatory elements required for macrophage  
799 and B cell identities. *Molecular cell*. 2010;38(4):576-89. Epub 2010/06/02. doi:  
800 10.1016/j.molcel.2010.05.004. PubMed PMID: 20513432; PubMed Central PMCID:  
801 PMC2898526.
- 802 40. Kim KD, Tanizawa H, De Leo A, Vladimirova O, Kossenkov A, Lu F, et al. Epigenetic  
803 specifications of host chromosome docking sites for latent Epstein-Barr virus. *Nat Commun*.  
804 2020;11(1):877. doi: 10.1038/s41467-019-14152-8. PubMed PMID: 32054837; PubMed Central  
805 PMCID: PMC7018943.
- 806 41. Tempera I, Wiedmer A, Dheekollu J, Lieberman PM. CTCF prevents the epigenetic drift of  
807 EBV latency promoter Qp. *PLoS Pathog*. 2010;6(8):e1001048. doi: 10.1371/journal.ppat.1001048.  
808 PubMed PMID: 20730088; PubMed Central PMCID: PMC2921154.
- 809 42. Rao SS, Huntley MH, Durand NC, Stamenova EK, Bochkov ID, Robinson JT, et al. A 3D  
810 map of the human genome at kilobase resolution reveals principles of chromatin looping. *Cell*.  
811 2014;159(7):1665-80. doi: 10.1016/j.cell.2014.11.021. PubMed PMID: 25497547; PubMed Central  
812 PMCID: PMC5635824.
- 813 43. Chen HS, Martin KA, Lu F, Lupey LN, Mueller JM, Lieberman PM, et al. Epigenetic  
814 deregulation of the LMP1/LMP2 locus of Epstein-Barr virus by mutation of a single CTCF-cohesin  
815 binding site. *Journal of virology*. 2014;88(3):1703-13. doi: 10.1128/JVI.02209-13. PubMed PMID:  
816 24257606; PubMed Central PMCID: PMC3911611.
- 817 44. Tempera I, Klichinsky M, Lieberman PM. EBV latency types adopt alternative chromatin  
818 conformations. *PLoS Pathog*. 2011;7(7):e1002180. doi: 10.1371/journal.ppat.1002180. PubMed  
819 PMID: 21829357; PubMed Central PMCID: PMC3145795.
- 820 45. Choi SJ, Jung SW, Huh S, Cho H, Kang H. Phylogenetic comparison of Epstein-Barr virus  
821 genomes. *J Microbiol*. 2018;56(8):525-33. doi: 10.1007/s12275-018-8039-x. PubMed PMID:  
822 29948828.
- 823 46. Chau CM, Zhang XY, McMahon SB, Lieberman PM. Regulation of Epstein-Barr virus latency

- 824 type by the chromatin boundary factor CTCF. *J Virol.* 2006;80(12):5723-32. doi: 10.1128/JVI.00025-  
825 06. PubMed PMID: 16731911; PubMed Central PMCID: PMCPMC1472585.
- 826 47. Holwerda S, de Laat W. Chromatin loops, gene positioning, and gene expression. *Front*  
827 *Genet.* 2012;3:217. doi: 10.3389/fgene.2012.00217. PubMed PMID: 23087710; PubMed Central  
828 PMCID: PMCPMC3473233.
- 829 48. Puglielli MT, Woisetschlaeger M, Speck SH. oriP is essential for EBNA gene promoter  
830 activity in Epstein-Barr virus-immortalized lymphoblastoid cell lines. *J Virol.* 1996;70(9):5758-68.  
831 doi: 10.1128/JVI.70.9.5758-5768.1996. PubMed PMID: 8709191; PubMed Central PMCID:  
832 PMCPMC190589.
- 833 49. Kang H, Wiedmer A, Yuan Y, Robertson E, Lieberman PM. Coordination of KSHV latent  
834 and lytic gene control by CTCF-cohesin mediated chromosome conformation. *PLoS Pathog.*  
835 2011;7(8):e1002140. doi: 10.1371/journal.ppat.1002140. PubMed PMID: 21876668; PubMed Central  
836 PMCID: PMCPMC3158054.
- 837 50. Weth O, Renkawitz R. CTCF function is modulated by neighboring DNA binding factors.  
838 *Biochem Cell Biol.* 2011;89(5):459-68. doi: 10.1139/o11-033. PubMed PMID: 21895576.
- 839 51. Herold M, Bartkuhn M, Renkawitz R. CTCF: insights into insulator function during  
840 development. *Development.* 2012;139(6):1045-57. doi: 10.1242/dev.065268. PubMed PMID:  
841 22354838.
- 842 52. Moquin SA, Thomas S, Whalen S, Warburton A, Fernandez SG, McBride AA, et al. The  
843 Epstein-Barr Virus Episome Maneuvers between Nuclear Chromatin Compartments during  
844 Reactivation. *J Virol.* 2018;92(3). doi: 10.1128/JVI.01413-17. PubMed PMID: 29142137; PubMed  
845 Central PMCID: PMCPMC5774889.
- 846 53. Campbell M, Watanabe T, Nakano K, Davis RR, Lyu Y, Tepper CG, et al. KSHV episomes  
847 reveal dynamic chromatin loop formation with domain-specific gene regulation. *Nat Commun.*  
848 2018;9(1):49. doi: 10.1038/s41467-017-02089-9. PubMed PMID: 29302027; PubMed Central PMCID:  
849 PMCPMC5754359.
- 850

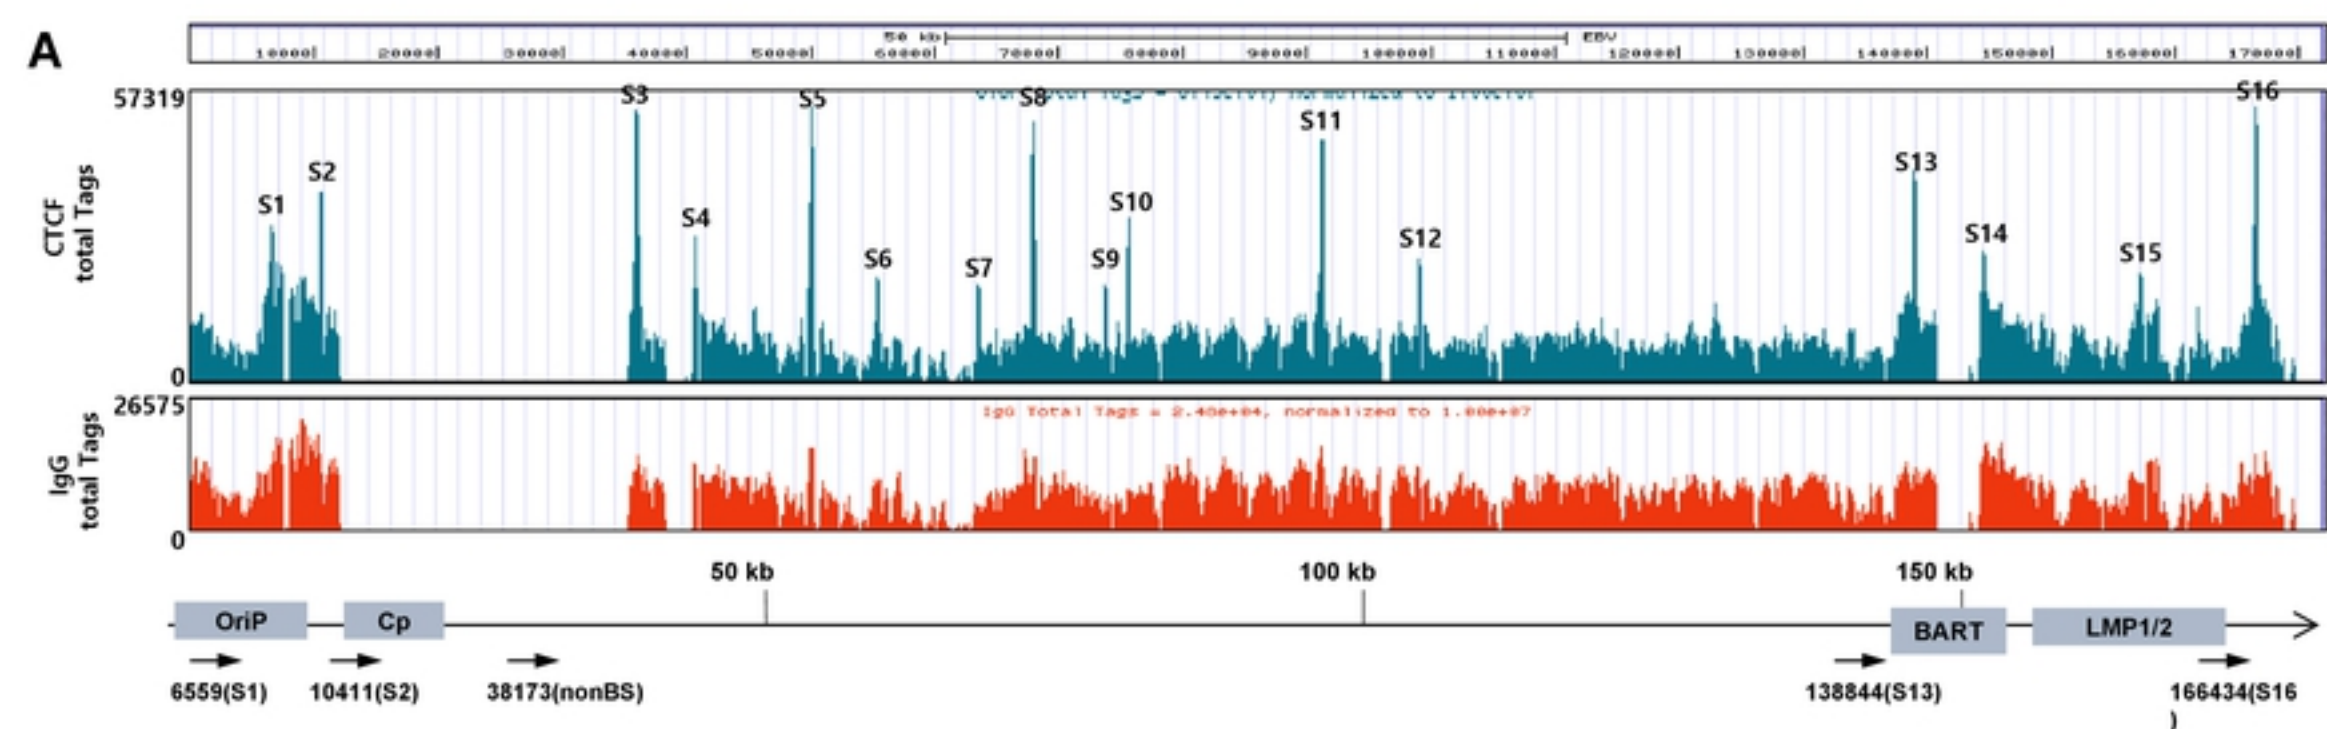

Fig. 1-1.

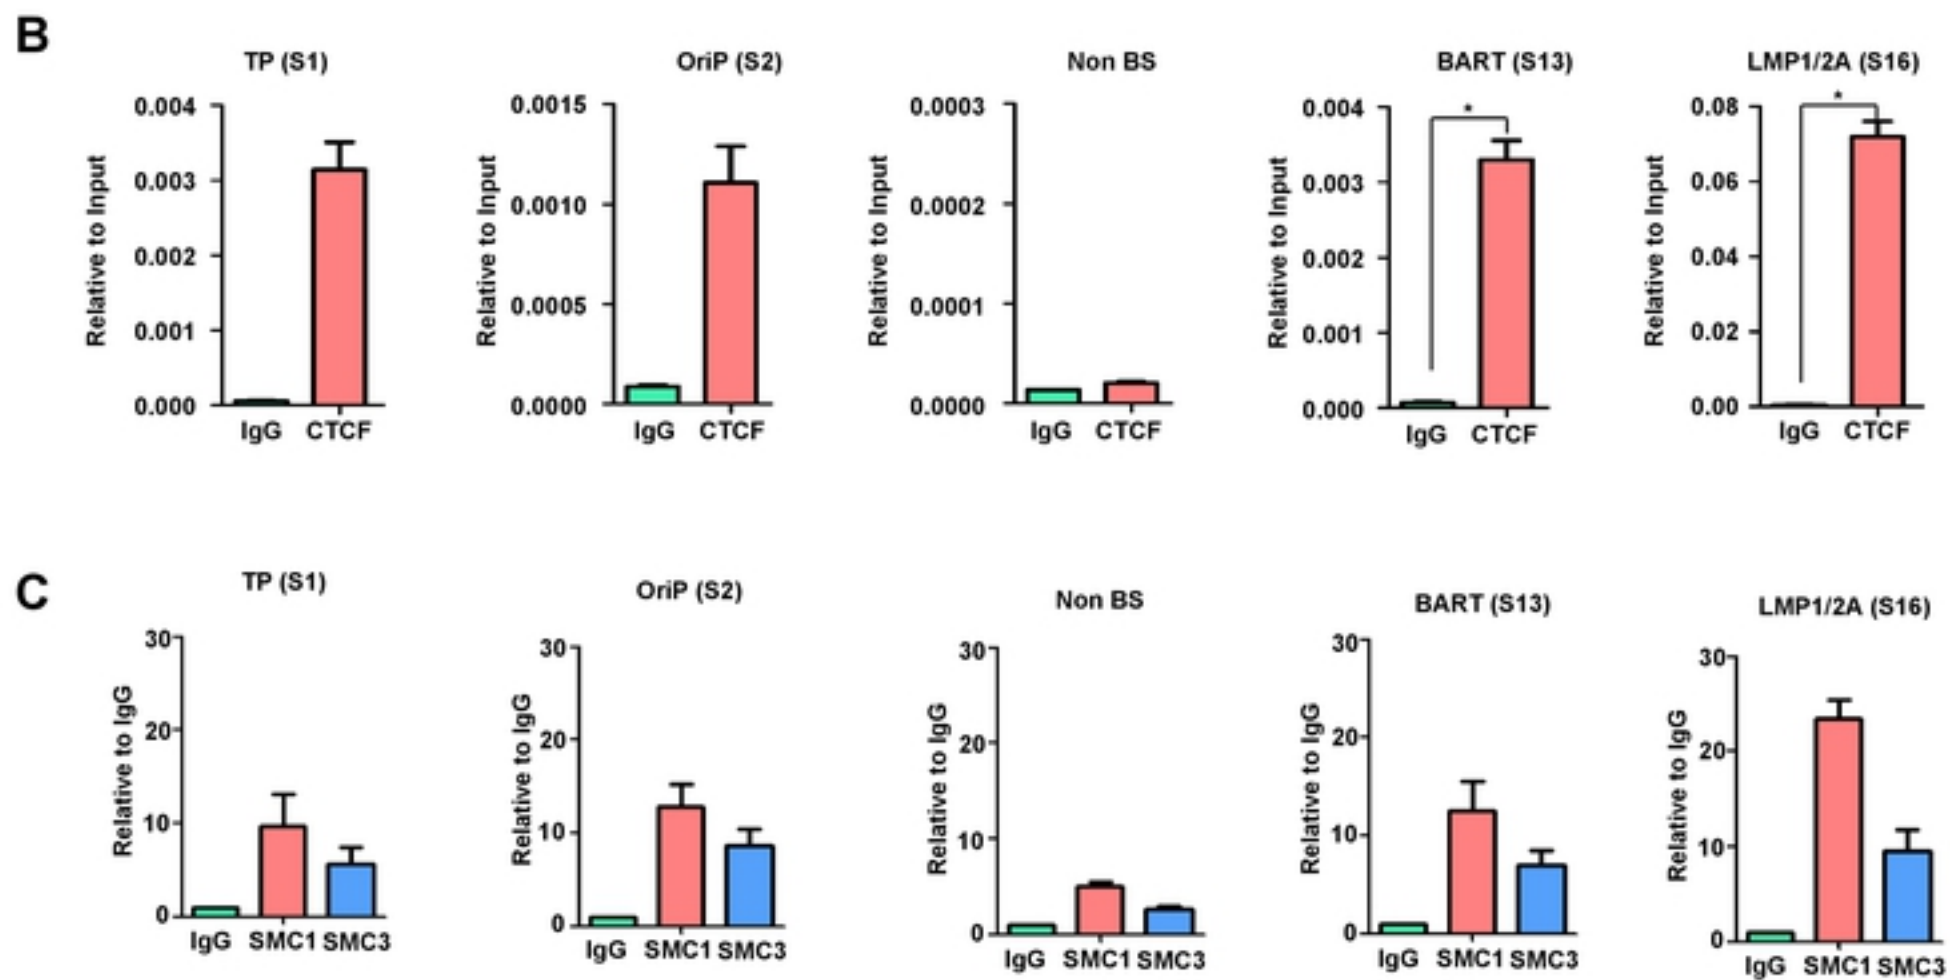

Fig. 1-2.

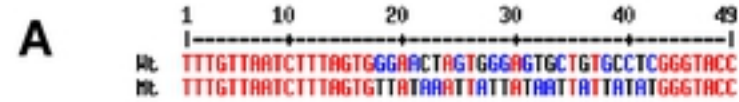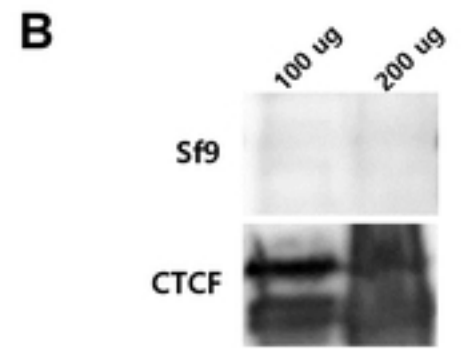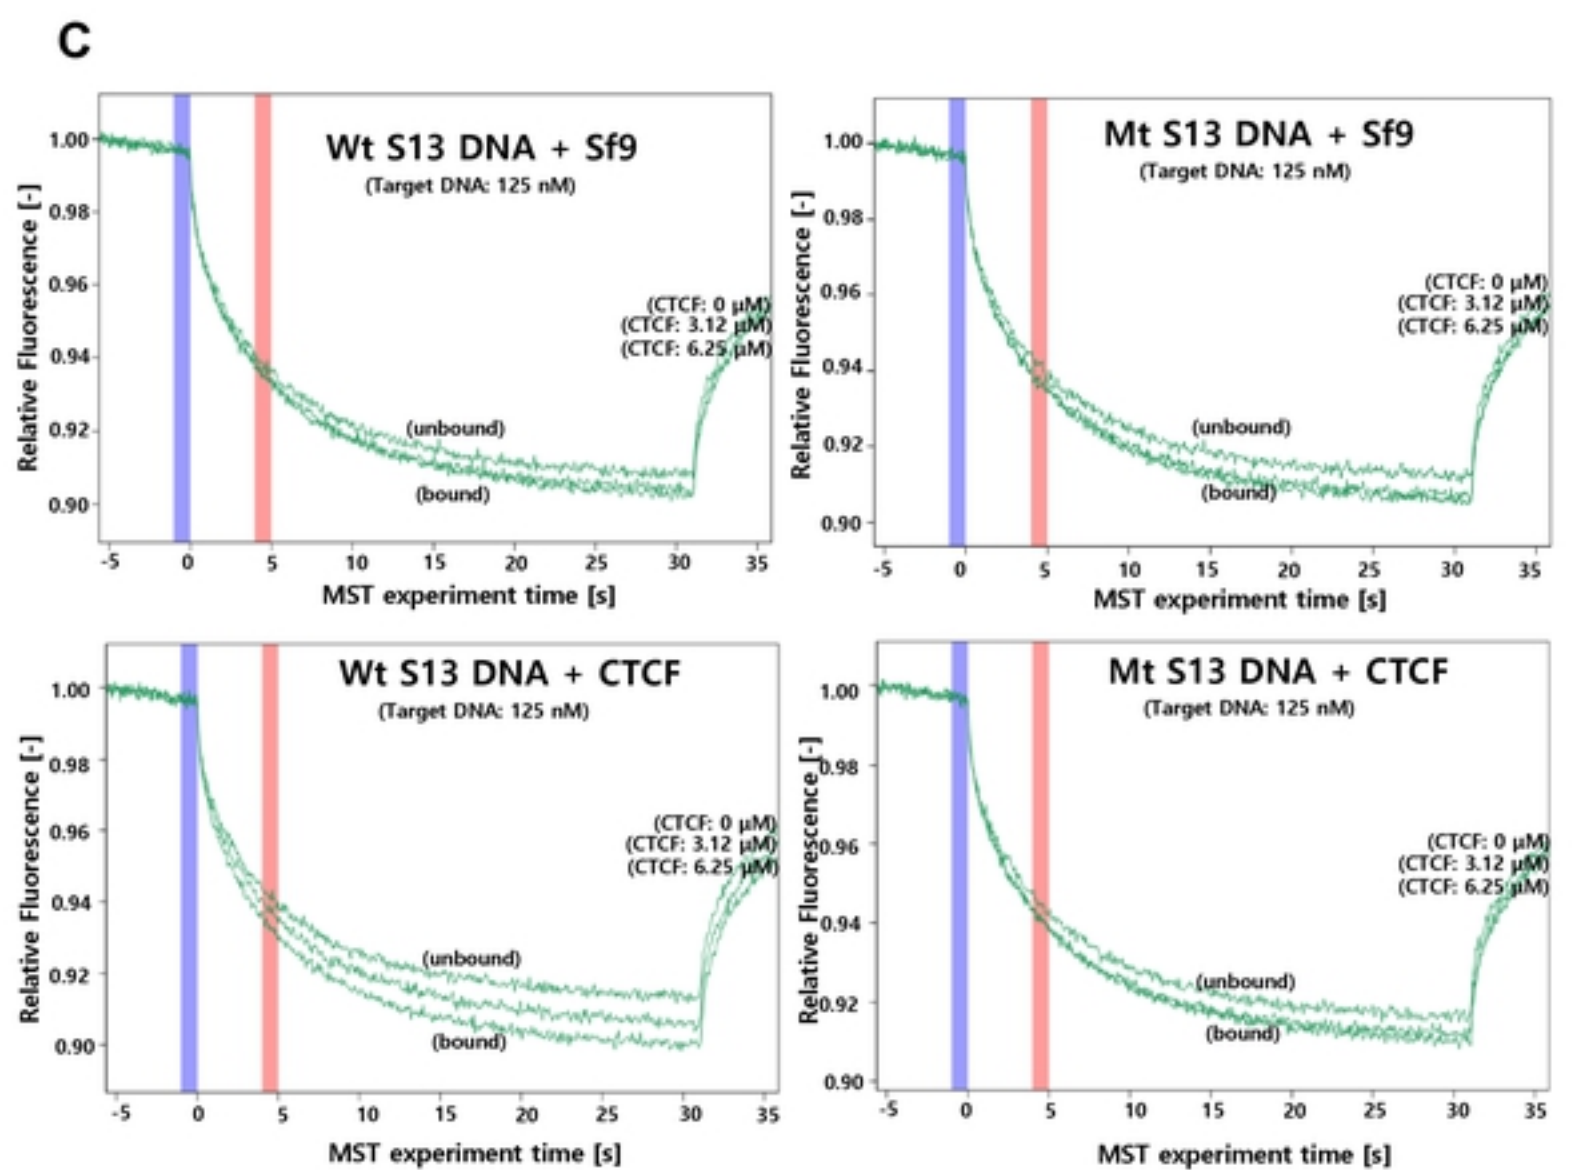

**Fig. 2.**

**A**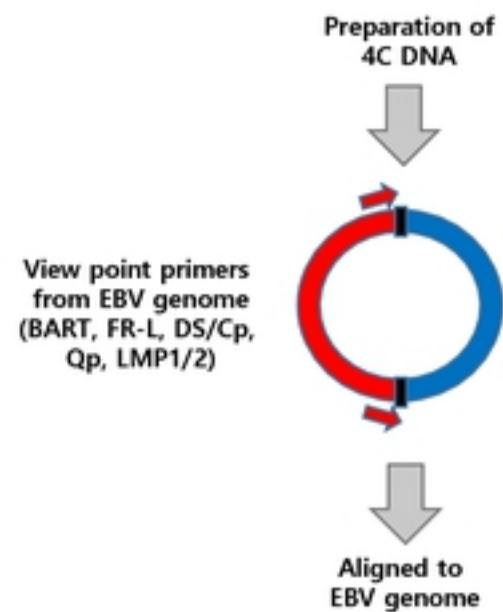**B**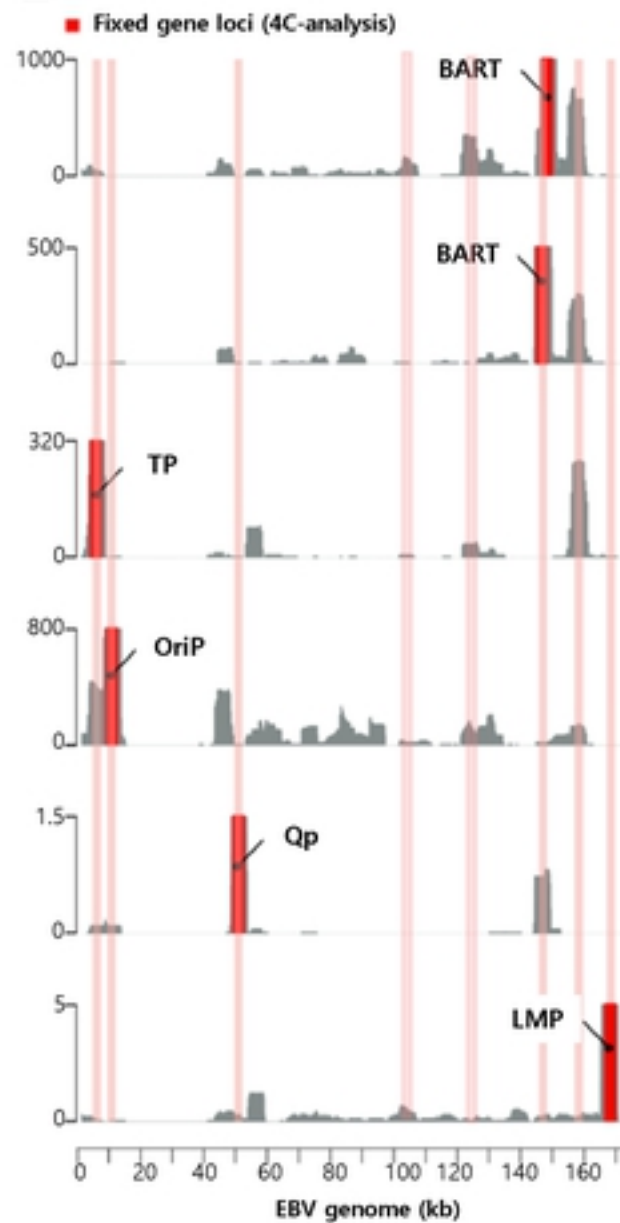**C**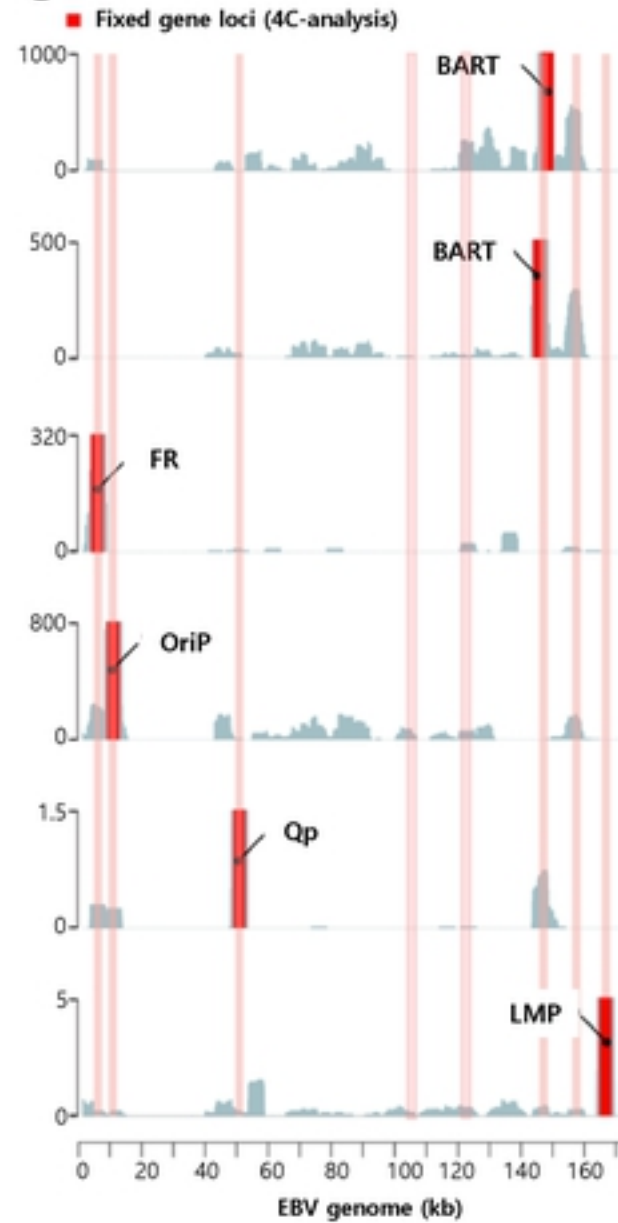

Fig. 3-1.

D

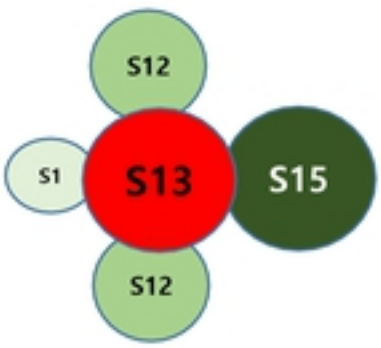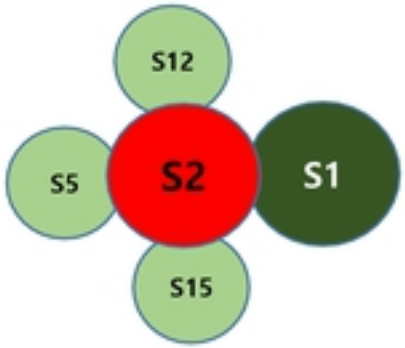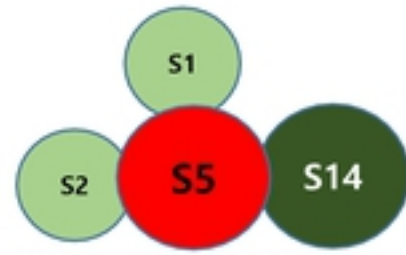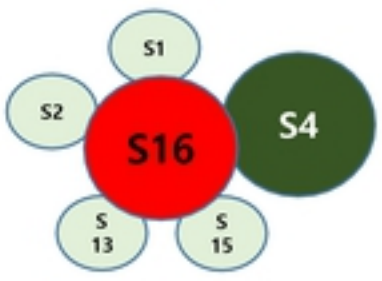

Fig. 3-2.



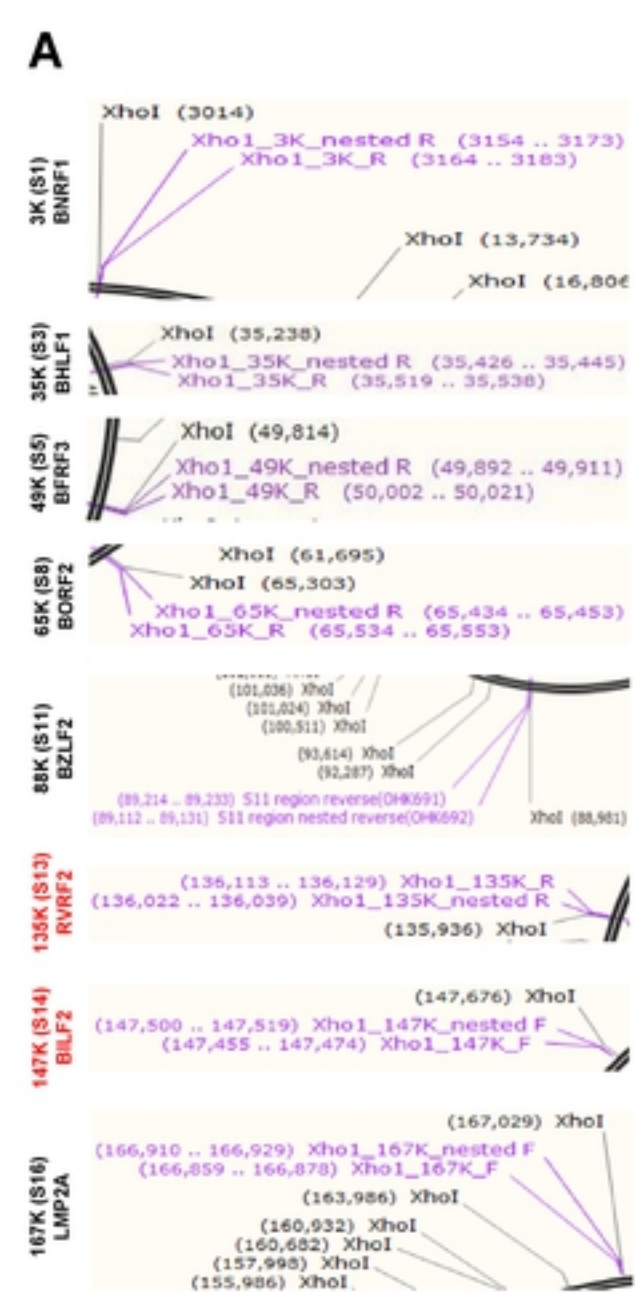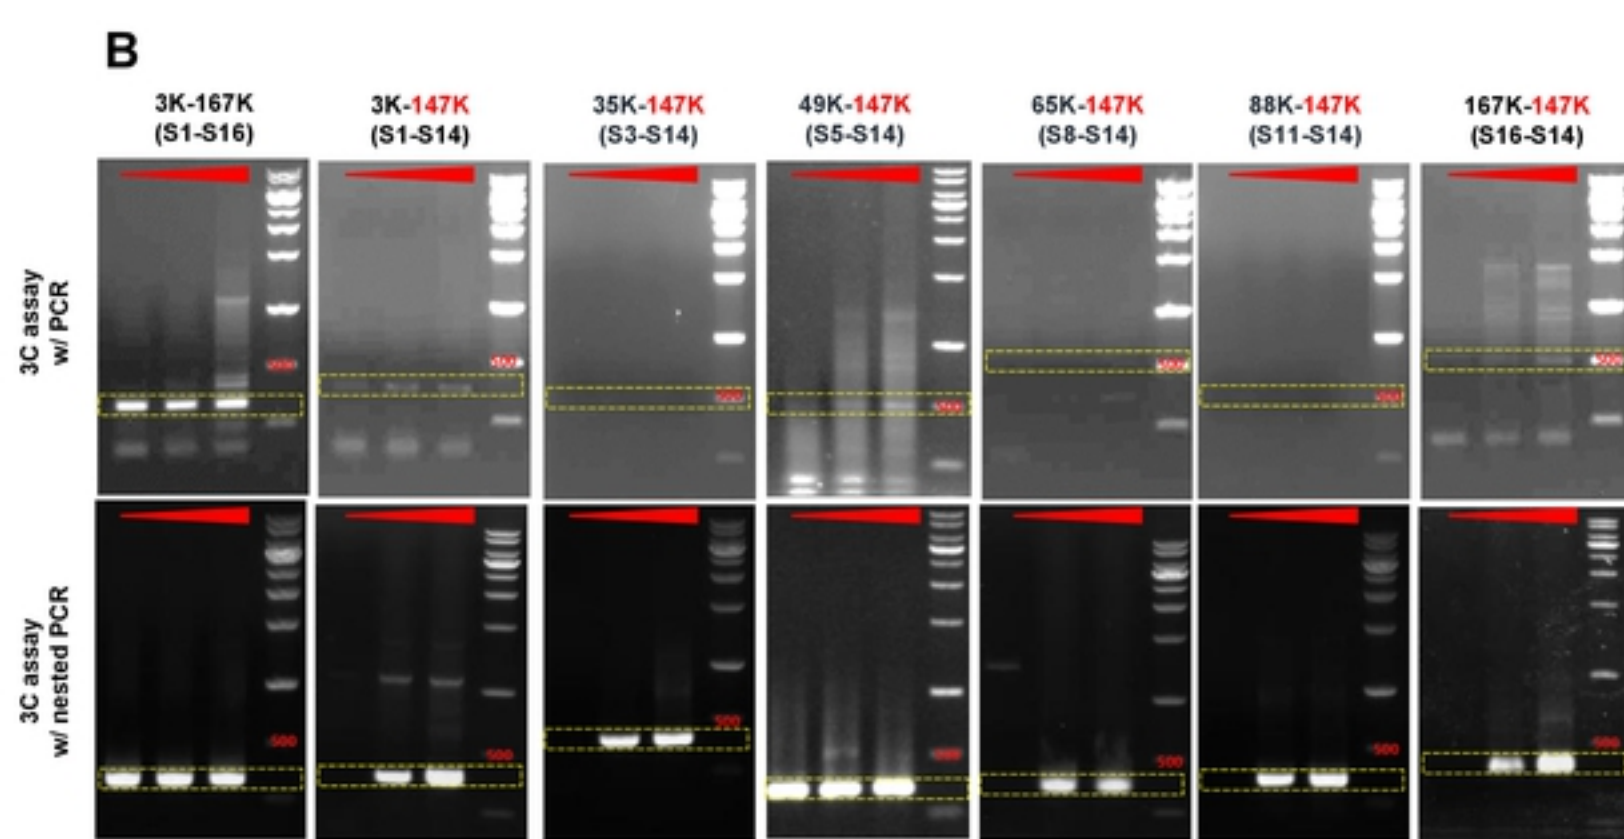

Fig. 4-1.

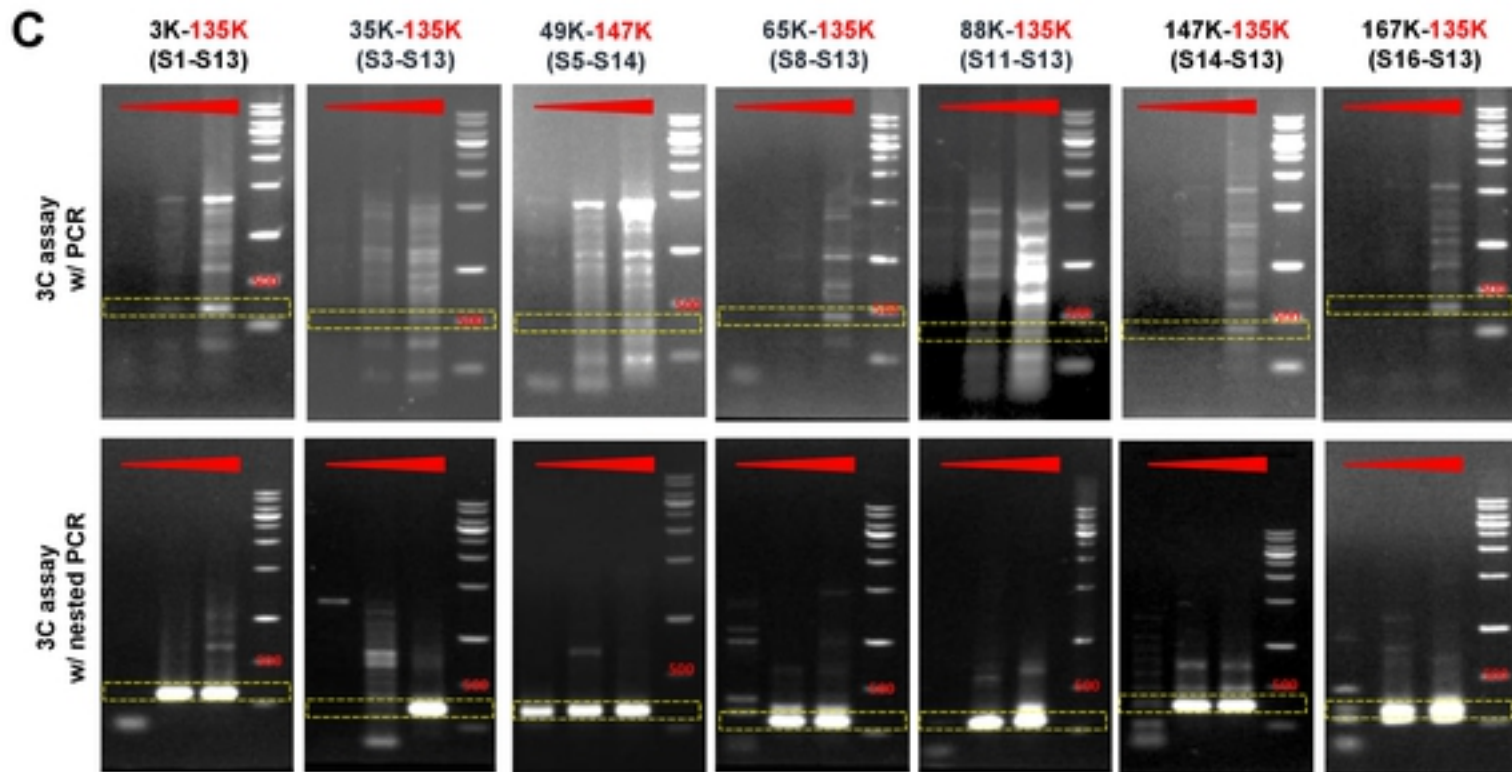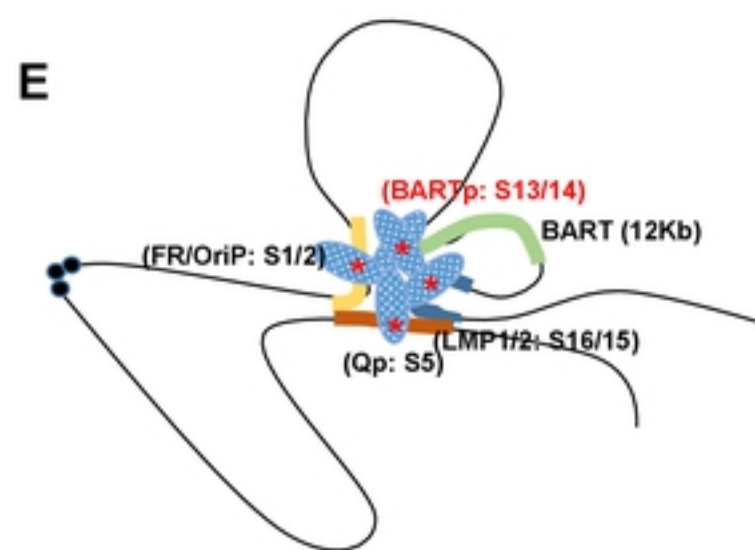

**D**

| 3K-167K |            | 3K (S1) | 35K (S3) | 49K (S5) | 65K (S8) | 88K (S11) | 135K (S13) | 147K (S14) | 167K (S16) |
|---------|------------|---------|----------|----------|----------|-----------|------------|------------|------------|
| OOO     | 147K (S14) | ooo     | xxx      | xoo      | xxx      | xxx       | xxo        |            | xxO        |
| OOO     | 135K (S13) | xxO     | xxx      | xxo      | xxo      | xxx       |            | xxo        | xxo        |

Fig. 4-2.

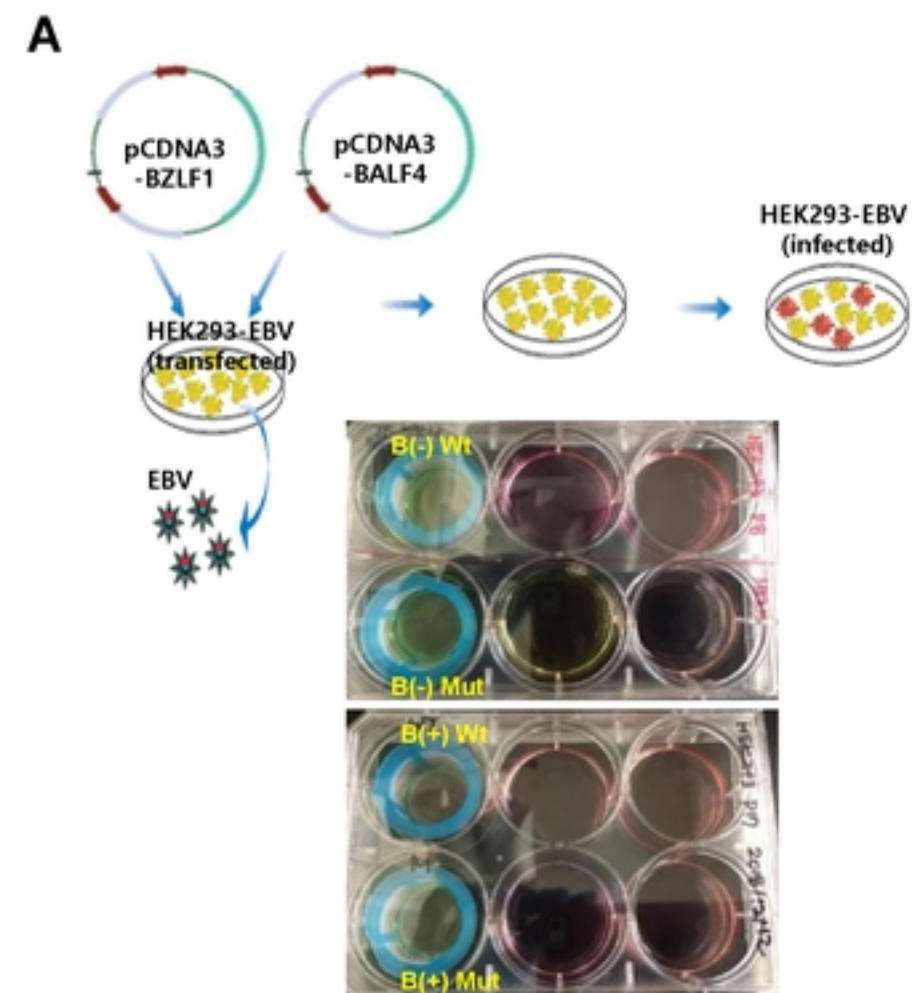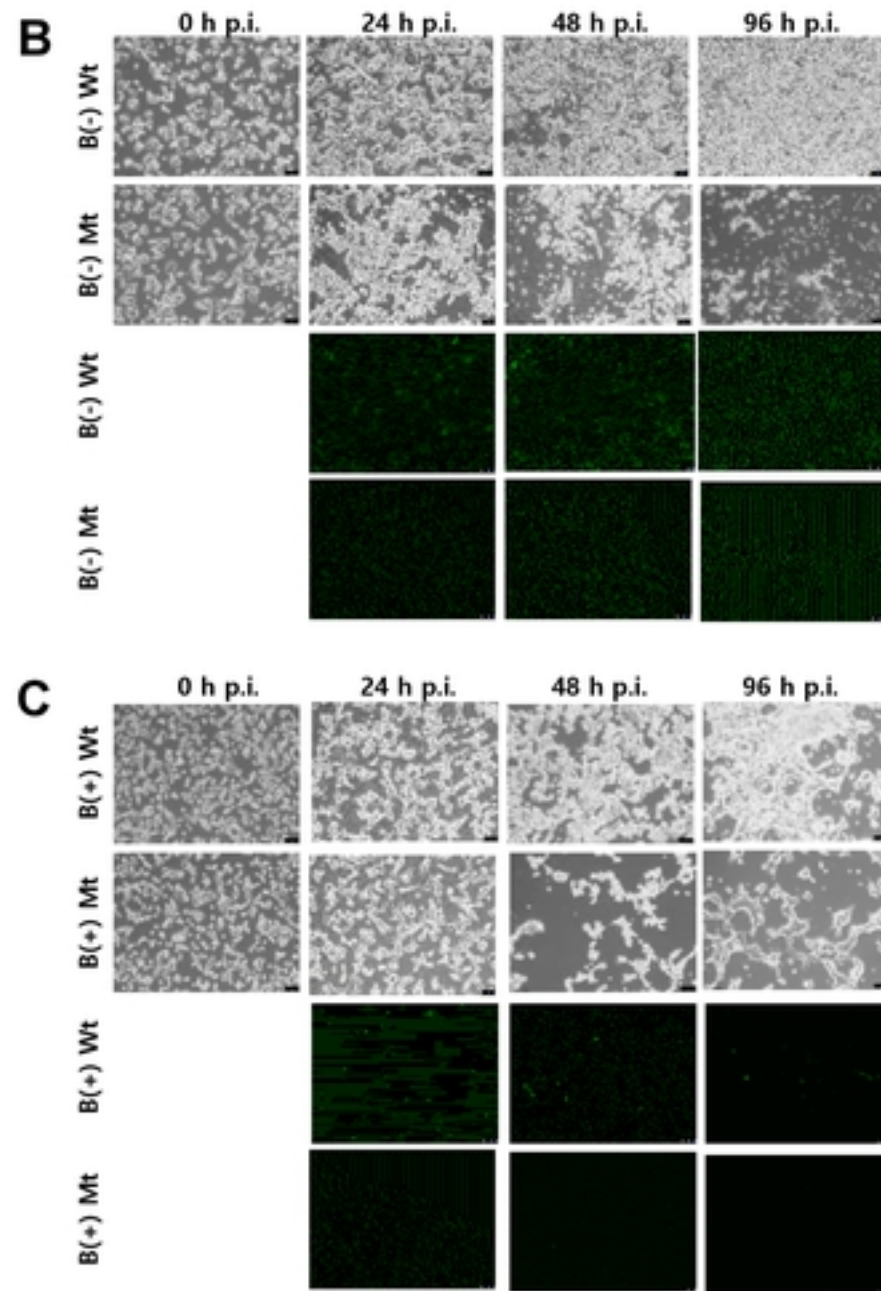

Fig. 5.

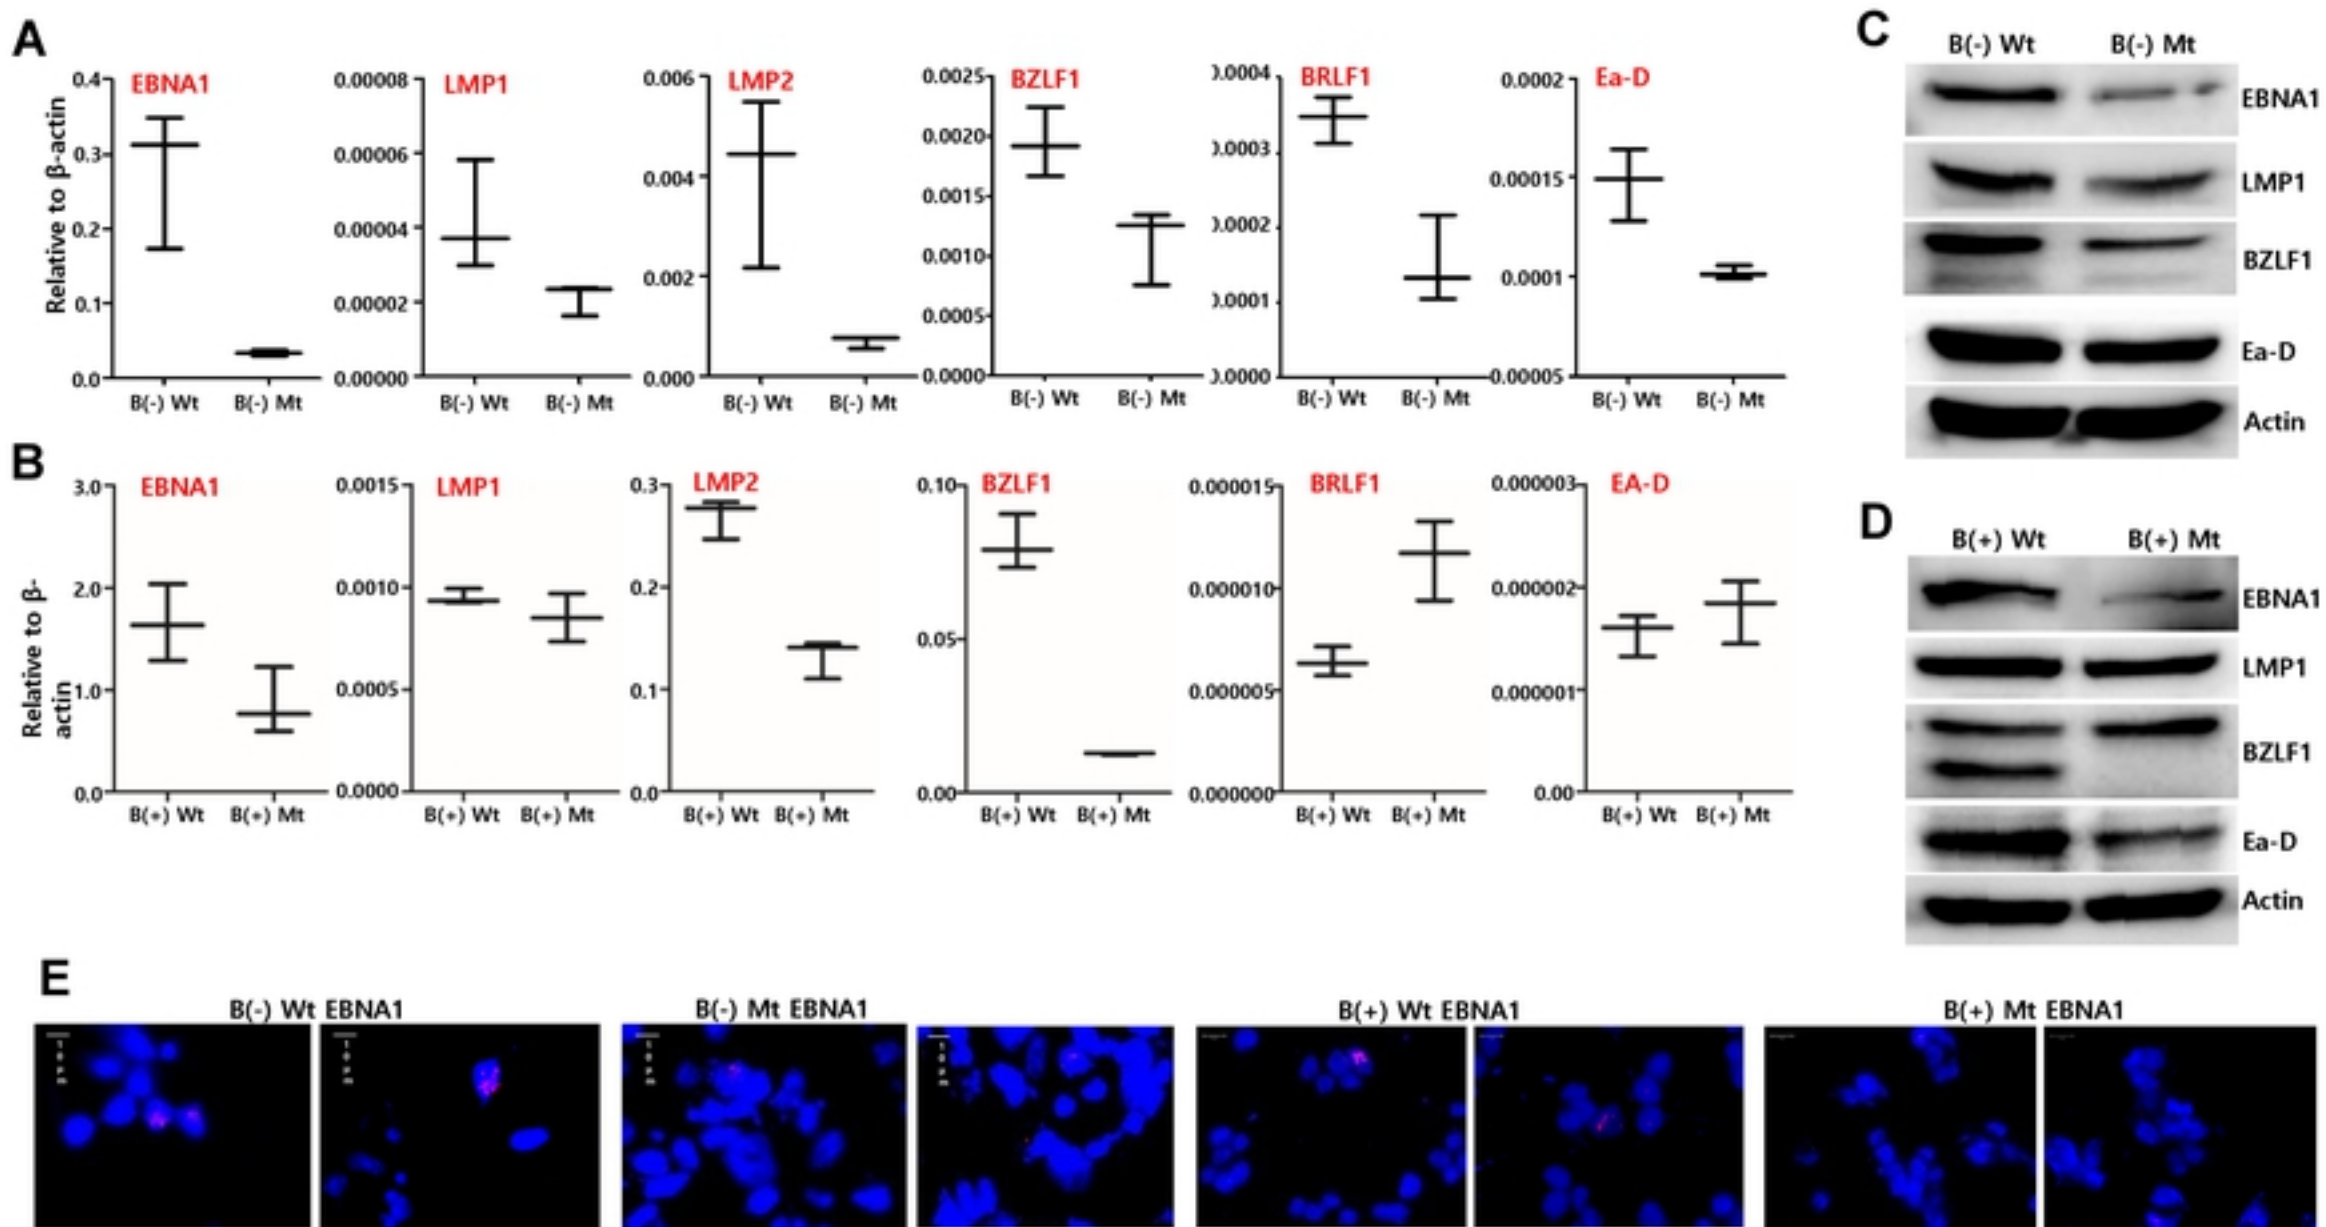

Fig. 6.

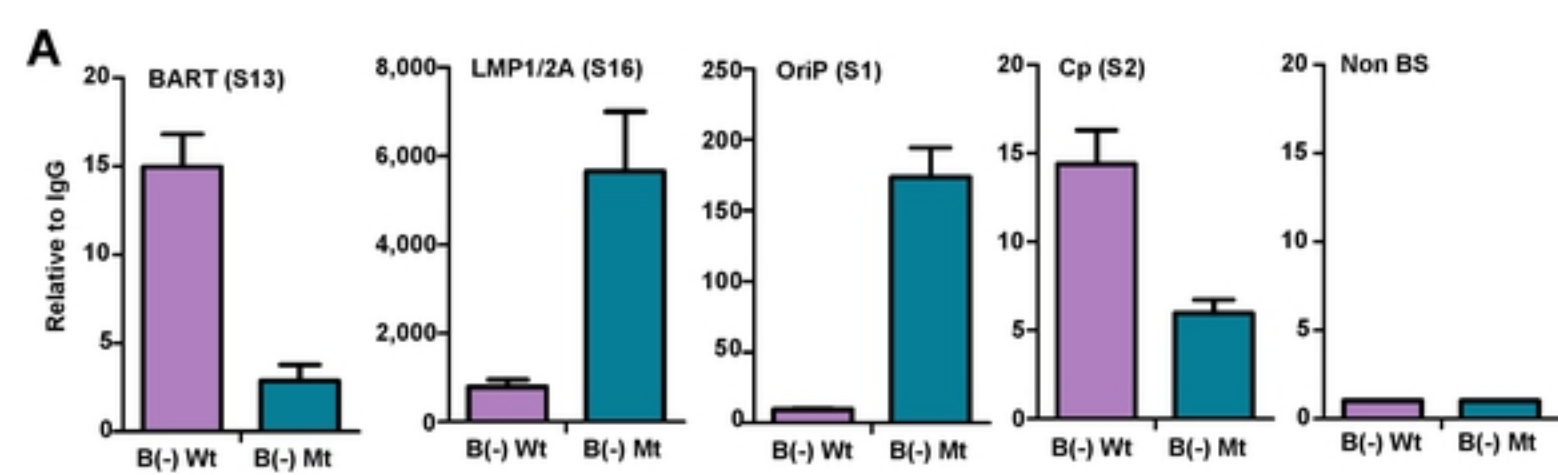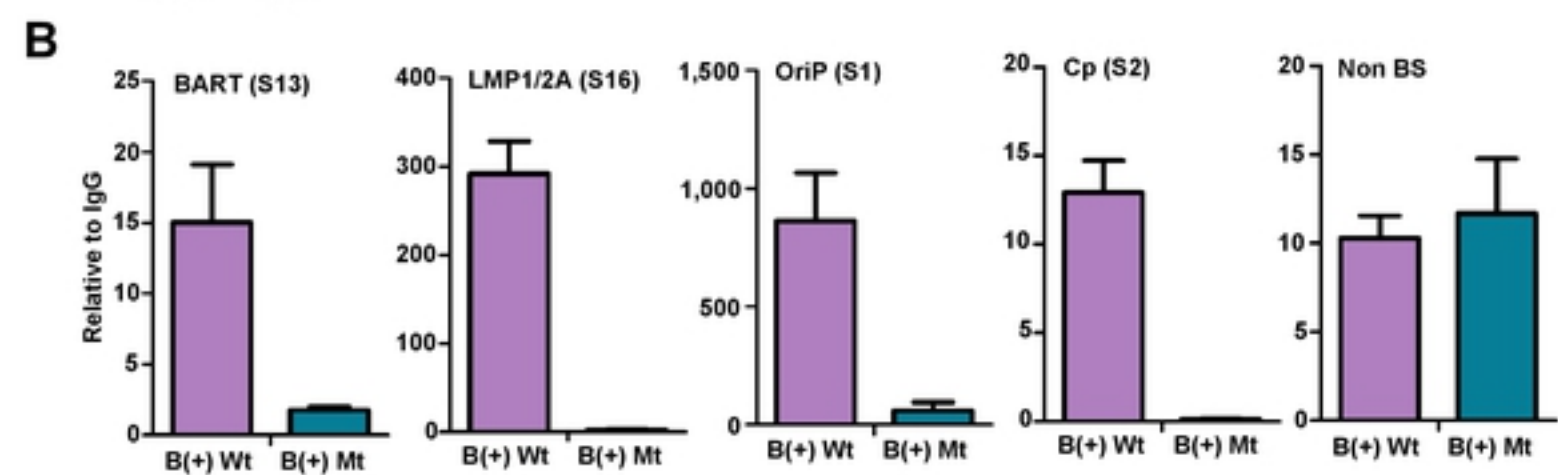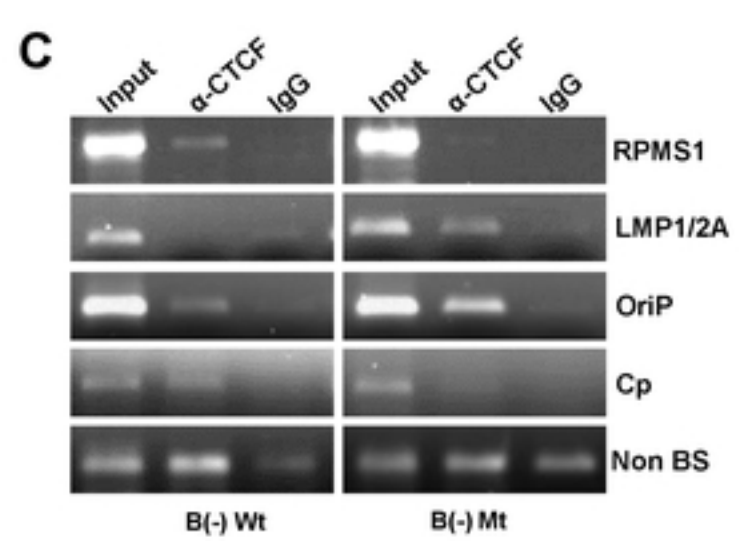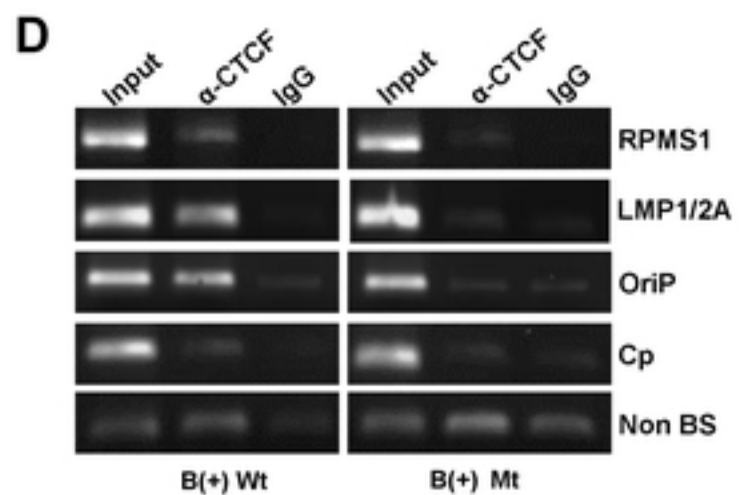

Fig. 7.

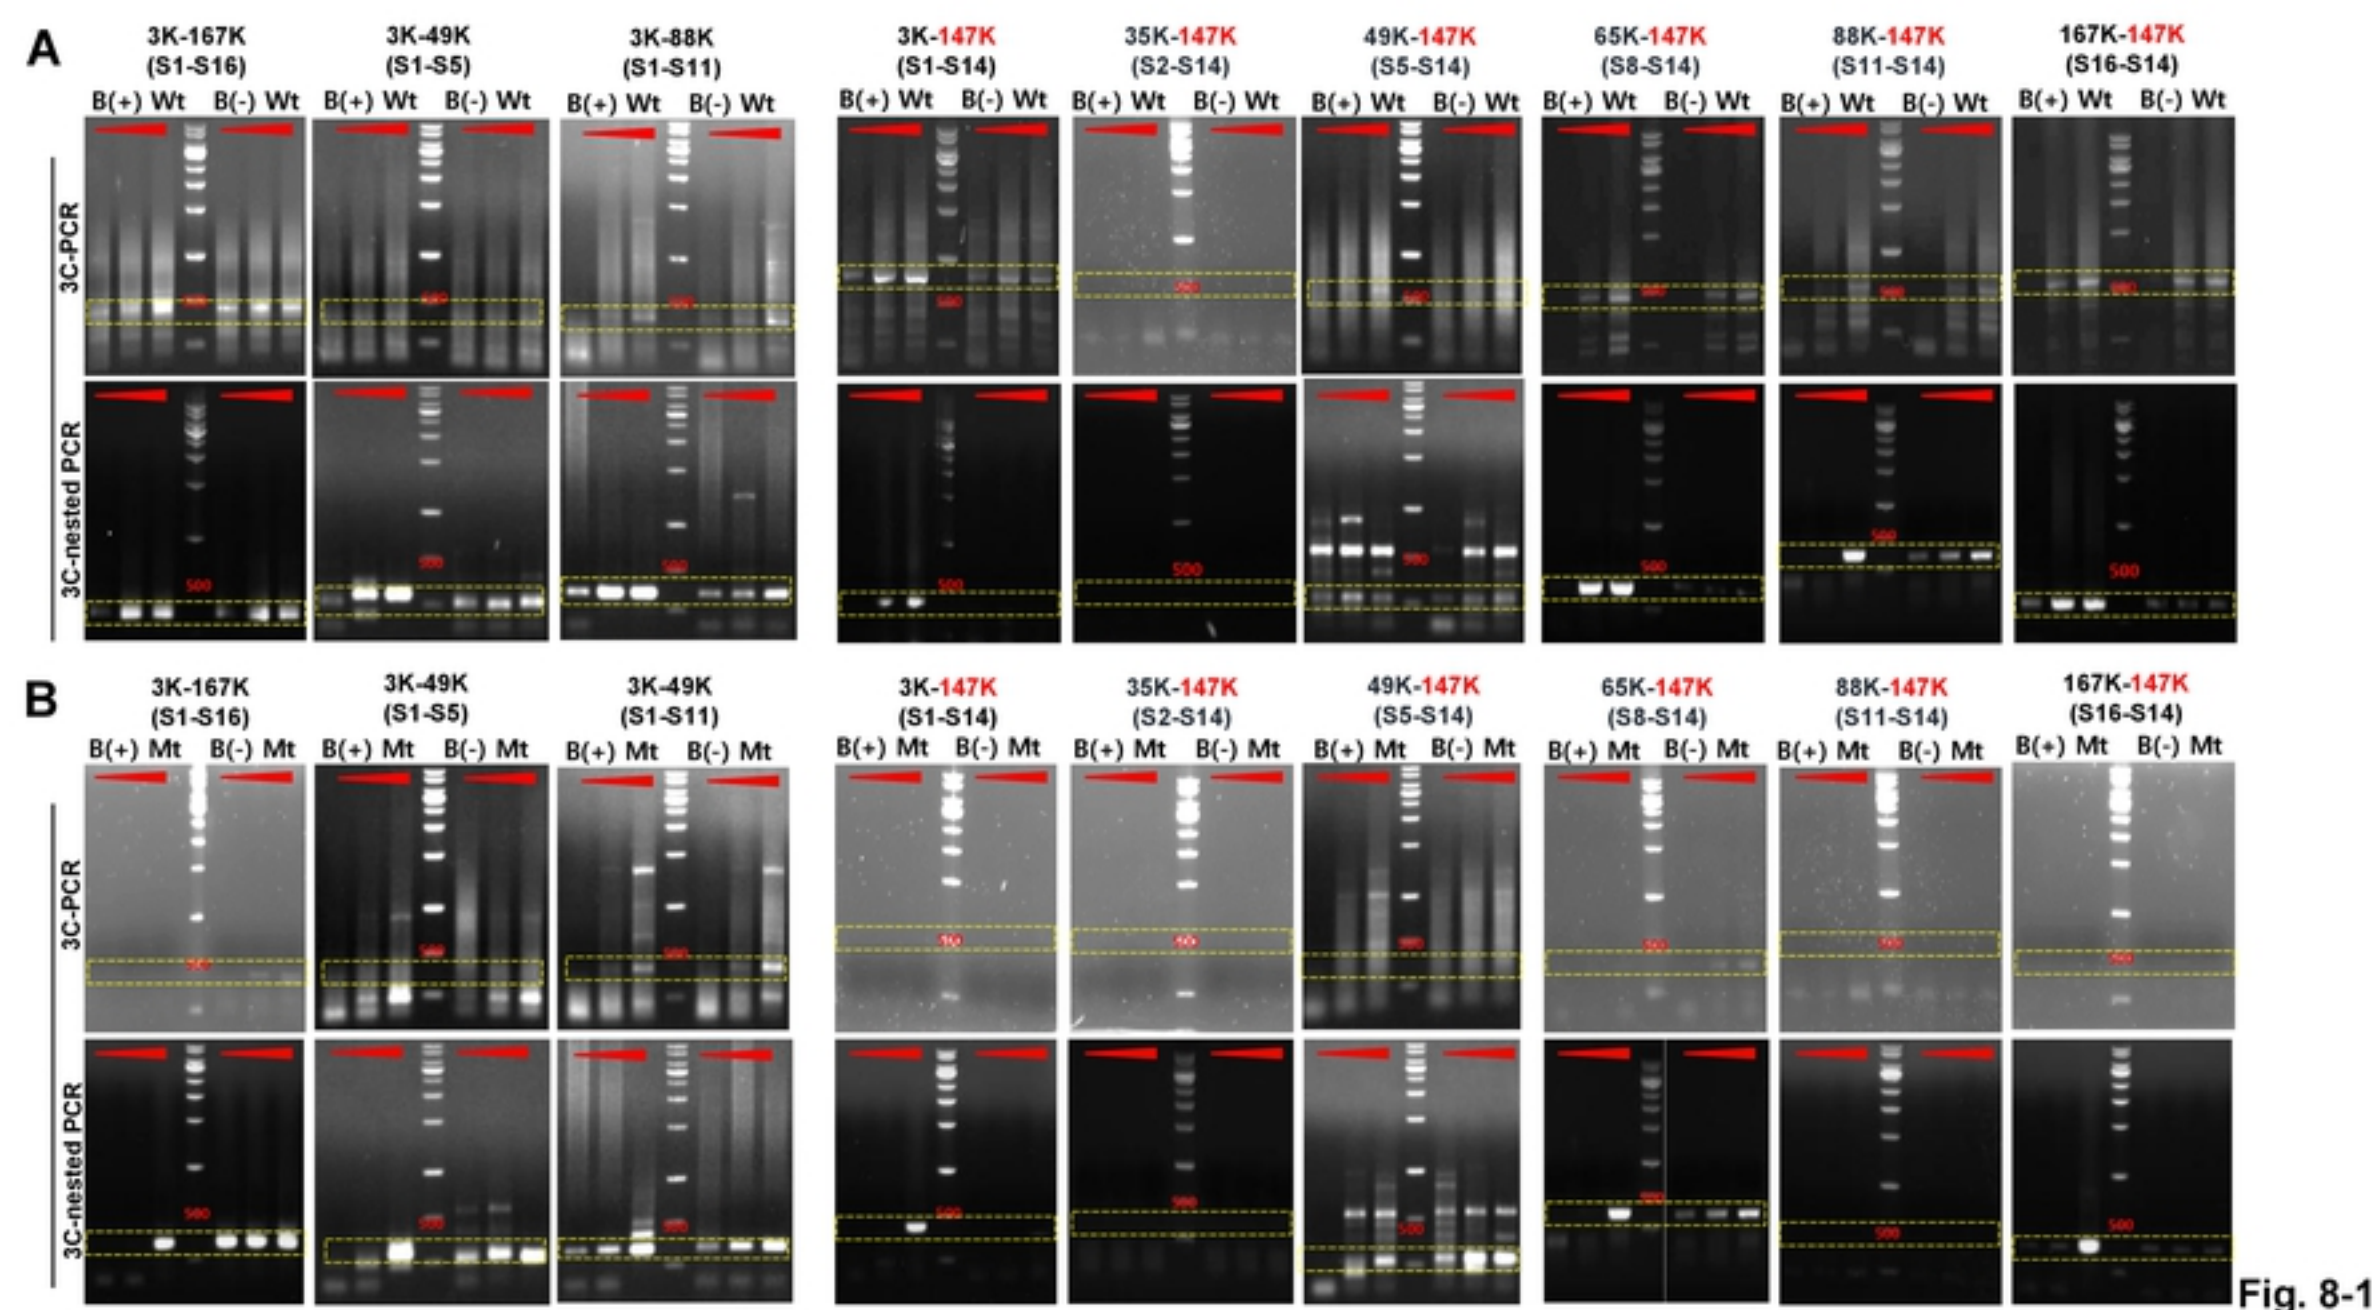

**C**

|         | 3K-167K |     | 3K-49K |     | 3K-88K |     | 3K-147K |     | 35K-147K |     | 49K-147K |     | 65K-147K |     | 88K-147K |     | 167K-147K |     |
|---------|---------|-----|--------|-----|--------|-----|---------|-----|----------|-----|----------|-----|----------|-----|----------|-----|-----------|-----|
| B(+) Wt | oOO     |     | xxo    |     | xoo    |     | oOO     |     | xxx      |     | xxo      |     | xoO      |     | xxo      |     | xoO       |     |
| B(-) Wt |         | oOO |        | xxx |        | xoO |         | ooo |          | xxx |          | xxo |          | xoo |          | xxo |           | xoo |
| B(+) Mt | xxx     |     | xxx    |     | xoO    |     | xxx     |     | xxx      |     | xxx      |     | xxx      |     | xxx      |     | xxx       |     |
| B(-) Mt |         | xoo |        | xxx |        | xoO |         | xxx |          | xxx |          | xxx |          | xoo |          | xxx |           | xxx |

**D**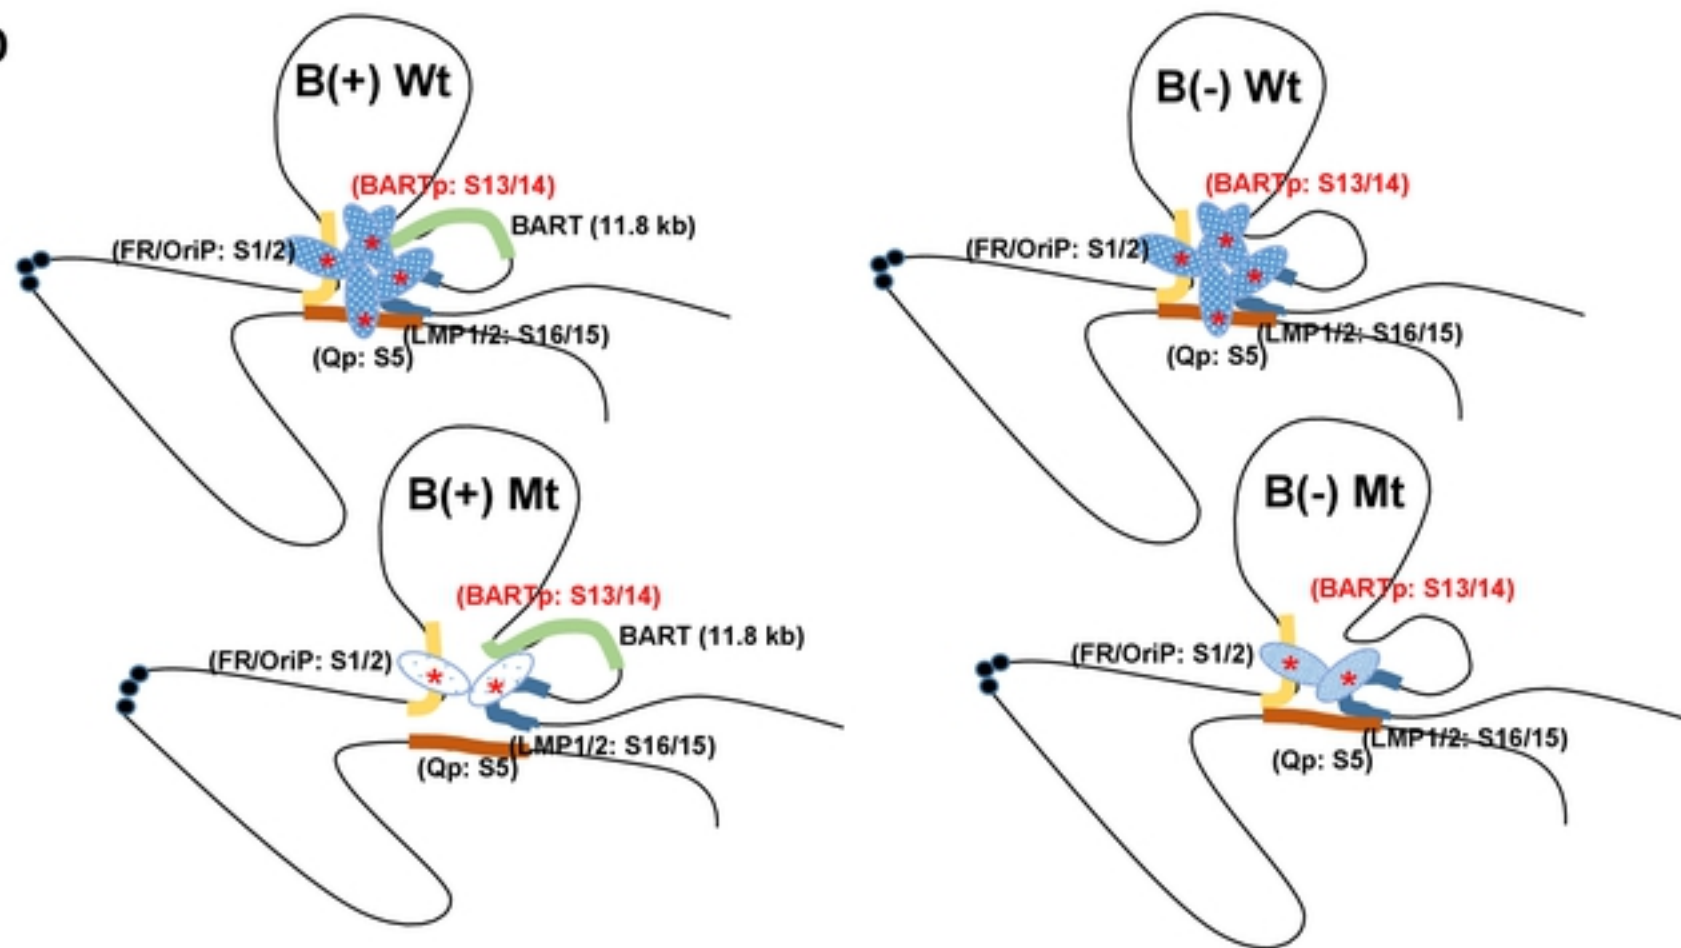**Fig. 8-2**

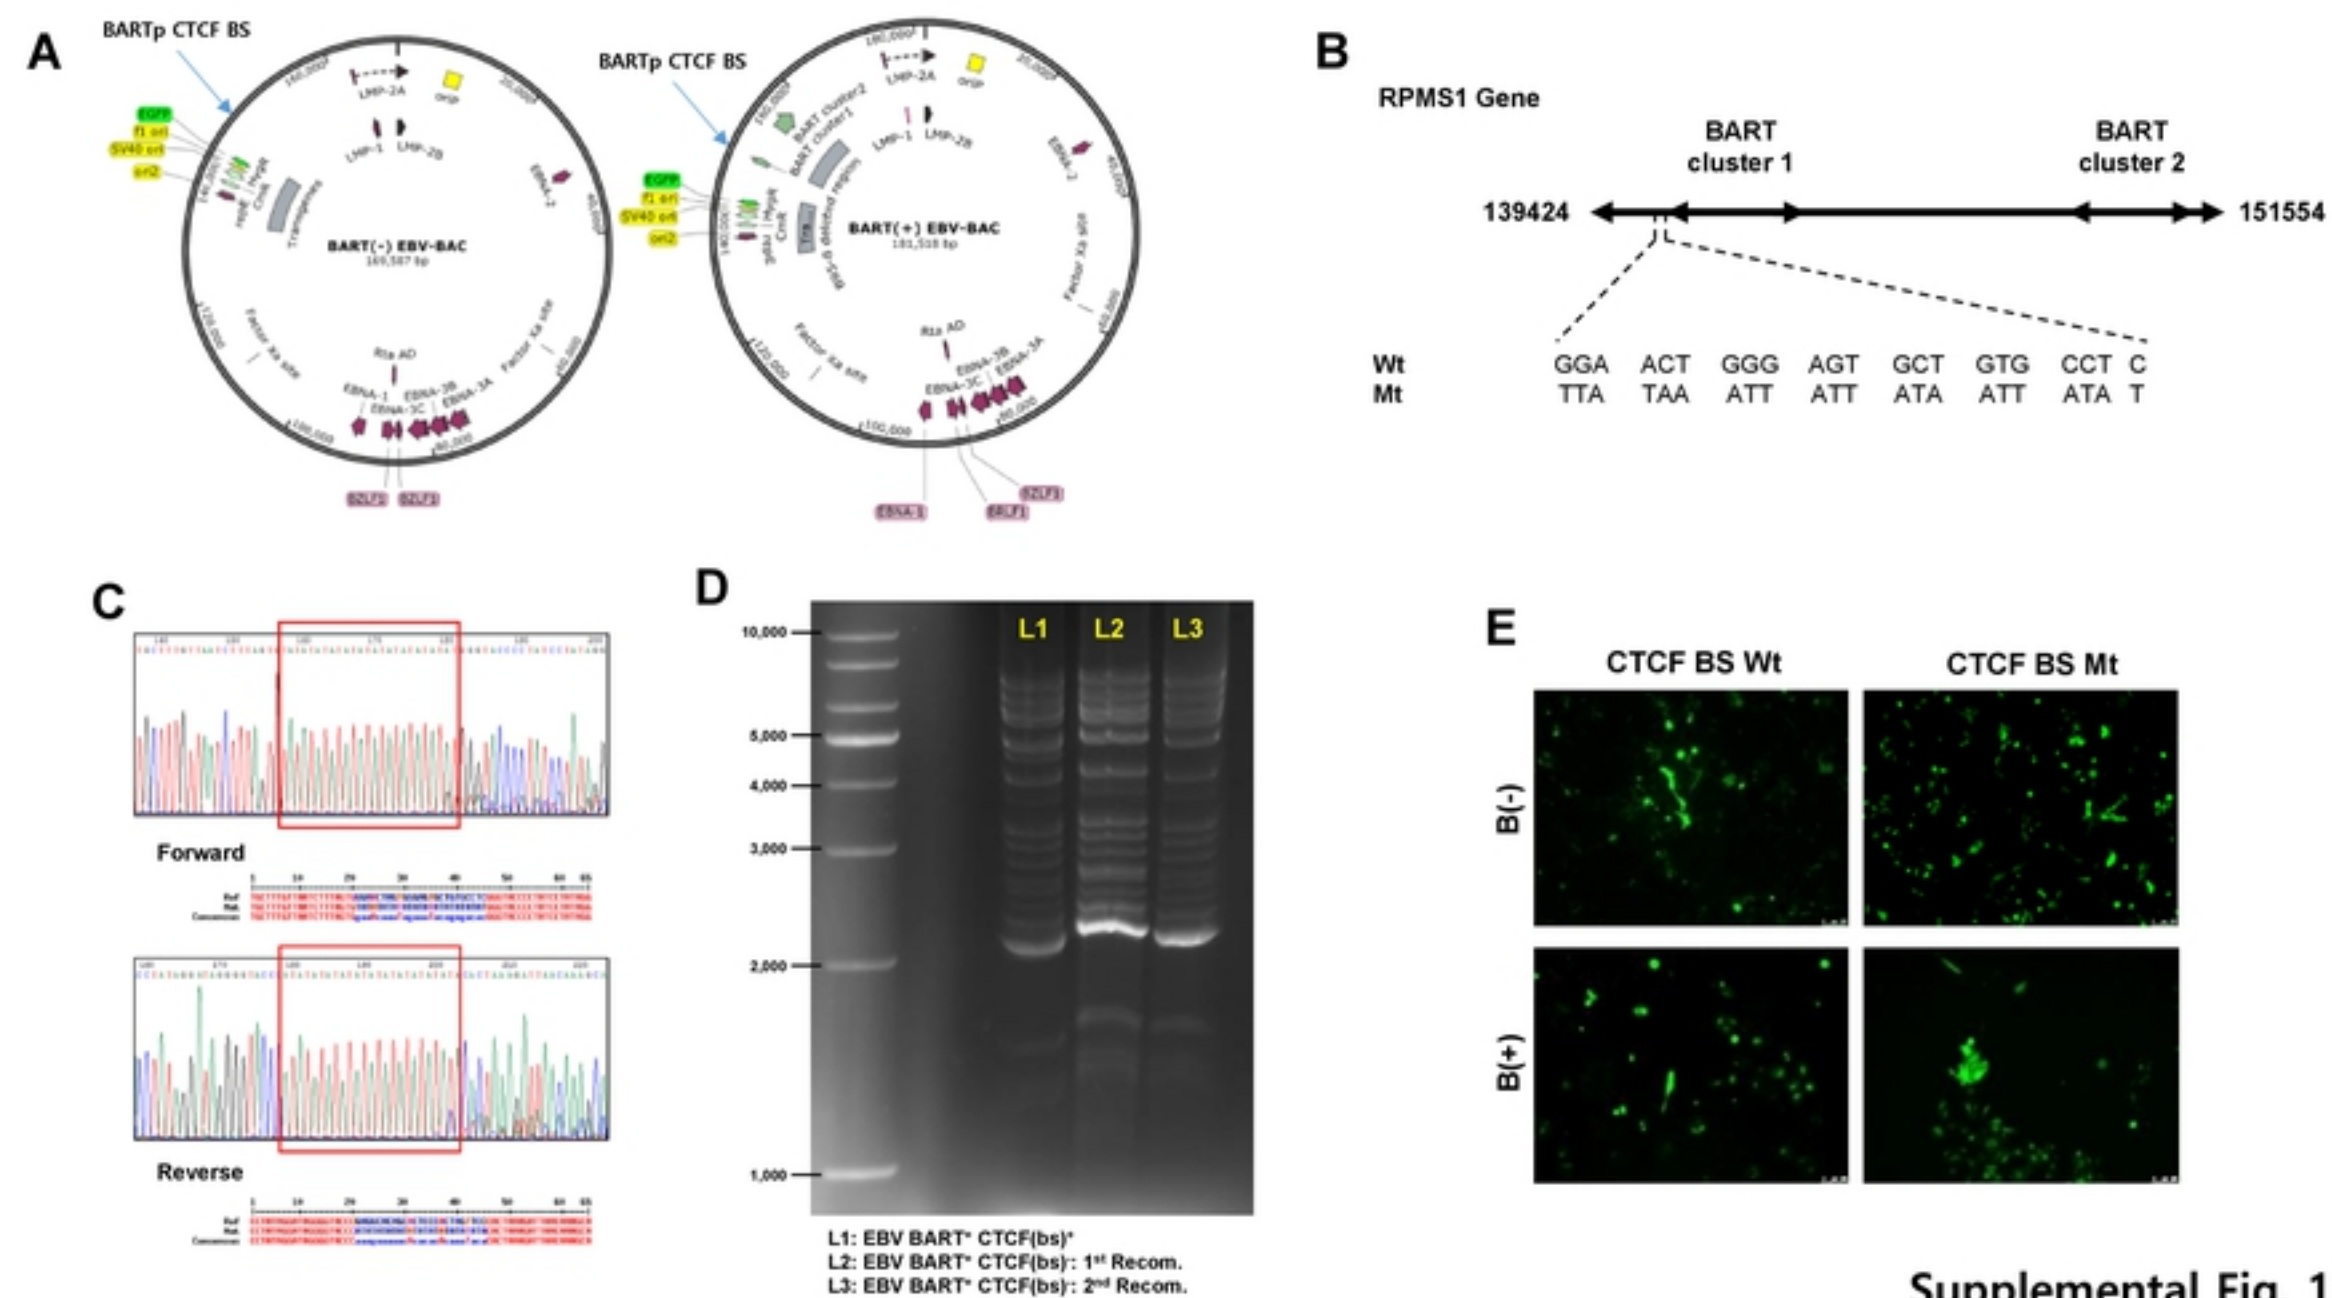

Supplemental Fig. 1.
